# Supplementary material for: Sequence Composition of Bacterial Chromosome Clones in a Transgressive Root-Knot Nematode Resistance Chromosome Region in Tetraploid Cotton
Source: Front Plant Sci. 2020 Dec 14;11:574486. doi: 10.3389/fpls.2020.574486 (PMC7767830; doi:10.3389/fpls.2020.574486)
Supplement: Supplementary Tables 30–32 — The alignment of Chr 11 BACs to Gossypium arboreum A2 (S30), G. raimondii D5 (S31), and G. barbadense AD2 (S32). [file Table_7.XLSX]

## Sheet: Table S30 A2-Chr11
Table S30 The alignment of Chr11 BACs to Gossypium arboreum (A2) (http://cgp.genomics.org.cn).
# BAC	Query id (BAC name + Congtig number)	Subject id (G. hirsutum mRNA Unigenes)	identity %	alignment length	mismatches	gap openings	q.start	q.end	s.start	s.end	e-value	hit
15	Chr11_15_CIR003_00012	gnl|BGIA2|CA_chr4	93.89	229	14	0	26688	26916	136367183	136366955	2e-91	346
15	Chr11_15_CIR003_00012	gnl|BGIA2|CA_chr4	91.82	611	25	7	24740	25325	136367181	136366571	0	828
15	Chr11_15_CIR003_00012	gnl|BGIA2|CA_chr4	92.77	1203	78	3	25321	26522	136364001	136362807	0	1731
15	Chr11_15_CIR003_00001	gnl|BGIA2|CA_chr4	97.25	2033	40	6	23957	25984	136312016	136314037	0	3430
10	Chr11_10_CM140_NAU1232_00007	gnl|BGIA2|CA_chr4	91.11	135	11	1	6569	6703	134577441	134577574	4e-42	182
10	Chr11_10_CM140_NAU1232_00007	gnl|BGIA2|CA_chr4	93.95	1373	63	12	5286	6640	134575881	134577251	0	2058
10	Chr11_10_CM140_NAU1232_00007	gnl|BGIA2|CA_chr4	94.74	4641	229	11	646	5283	134571199	134575827	0	7204
10	Chr11_10_CM140_NAU1232_00006	gnl|BGIA2|CA_chr4	96.85	127	4	0	181	307	134570764	134570890	3e-53	213
10	Chr11_10_CM140_NAU1232_00005	gnl|BGIA2|CA_chr4	92.01	1627	123	5	94	1717	134346547	134344925	0	2278
11	Chr11_11_NAU2152_00003	gnl|BGIA2|CA_chr4	96.96	2366	49	9	15400	17756	131259966	131262317	0	3949
11	Chr11_11_NAU2152_00003	gnl|BGIA2|CA_chr4	92.39	447	6	3	14863	15295	131259531	131259963	3e-171	612
11	Chr11_11_NAU2152_00003	gnl|BGIA2|CA_chr4	98.08	6362	102	9	8390	14740	131253174	131259526	0	11055
11	Chr11_11_NAU2152_00003	gnl|BGIA2|CA_chr4	97.06	204	6	0	7975	8178	131253021	131253224	1e-90	344
11	Chr11_11_NAU2152_00003	gnl|BGIA2|CA_chr4	97.07	273	5	1	7630	7899	131252801	131253073	1e-124	457
11	Chr11_11_NAU2152_00003	gnl|BGIA2|CA_chr4	98.34	7654	76	23	1	7611	131245209	131252854	0	13383
11	Chr11_11_NAU2152_00004	gnl|BGIA2|CA_chr4	98.91	1923	9	3	15757	17677	131243188	131245100	0	3424
11	Chr11_11_NAU2152_00004	gnl|BGIA2|CA_chr4	92.11	380	30	0	5207	5586	131241155	131241534	8e-149	536
11	Chr11_11_NAU2152_00004	gnl|BGIA2|CA_chr4	99.07	8305	64	6	7452	15746	131234936	131243237	0	14898
11	Chr11_11_NAU2152_00004	gnl|BGIA2|CA_chr4	99.38	809	4	1	5550	6358	131233124	131233931	0	1465
11	Chr11_11_NAU2152_00004	gnl|BGIA2|CA_chr4	98.25	3832	32	8	1062	4868	131228675	131232496	0	6673
6	Chr11_6_UCR61_00005	gnl|BGIA2|CA_chr4	92.3	1921	135	10	17	1926	131181839	131179921	0	2715
6	Chr11_6_UCR61_00032	gnl|BGIA2|CA_chr4	90.44	272	26	0	6	277	131172660	131172931	3e-97	359
6	Chr11_6_UCR61_00005	gnl|BGIA2|CA_chr4	93.05	979	27	9	4542	5499	131155448	131154490	0	1393
6	Chr11_6_UCR61_00021	gnl|BGIA2|CA_chr4	94.95	1526	56	8	10201	11726	131155430	131156934	0	2372
6	Chr11_6_UCR61_00005	gnl|BGIA2|CA_chr4	96.36	4618	124	27	5501	10097	131154432	131149838	0	7557
6	Chr11_6_UCR61_00001	gnl|BGIA2|CA_chr4	90.04	1044	73	12	4573	5588	131147481	131148521	0	1323
6	Chr11_6_UCR61_00002	gnl|BGIA2|CA_chr4	97.28	2423	61	5	181	2601	131138703	131136284	0	4104
6	Chr11_6_UCR61_00022	gnl|BGIA2|CA_chr4	96.89	386	12	0	1	386	131135403	131135788	0	647
6	Chr11_6_UCR61_00036	gnl|BGIA2|CA_chr4	97.09	1479	43	0	1	1479	131133699	131135177	0	2494
6	Chr11_6_UCR61_00024	gnl|BGIA2|CA_chr4	97.25	1565	43	0	1436	3000	131133613	131135177	0	2652
6	Chr11_6_UCR61_00024	gnl|BGIA2|CA_chr4	97.95	487	10	0	981	1467	131133126	131133612	0	845
6	Chr11_6_UCR61_00024	gnl|BGIA2|CA_chr4	97.7	566	9	2	296	860	131132459	131133021	0	970
6	Chr11_6_UCR61_00016	gnl|BGIA2|CA_chr4	98.65	371	5	0	1	371	131121012	131120642	0	658
6	Chr11_6_UCR61_00006	gnl|BGIA2|CA_chr4	91.25	1622	120	17	1	1608	131120820	131119207	0	2189
6	Chr11_6_UCR61_00015	gnl|BGIA2|CA_chr4	91.93	285	11	1	137	409	131120370	131120086	5e-106	388
6	Chr11_6_UCR61_00030	gnl|BGIA2|CA_chr4	96.8	344	11	0	1	344	131120277	131120620	3e-162	575
6	Chr11_6_UCR61_00007	gnl|BGIA2|CA_chr4	97.41	3007	45	13	1	2974	131116933	131119939	0	5090
9	Chr11_9_UCR49_00002	gnl|BGIA2|CA_chr4	97.49	11033	171	38	10244	21203	130785189	130796188	0	18742
9	Chr11_9_UCR49_00002	gnl|BGIA2|CA_chr4	99.06	5085	47	1	5110	10194	130780116	130785199	0	9123
9	Chr11_9_UCR49_00002	gnl|BGIA2|CA_chr4	91.88	320	24	2	5	324	130764692	130765009	3e-121	446
9	Chr11_9_UCR49_00002	gnl|BGIA2|CA_chr4	91.73	665	50	5	2703	3363	130761322	130761985	0	918
9	Chr11_9_UCR49_00002	gnl|BGIA2|CA_chr4	91.59	2415	169	25	311	2699	130758873	130761279	0	3304
8	Chr11_8_CIR316_00004	gnl|BGIA2|CA_chr4	96.72	5794	122	28	22675	28432	130723898	130729659	0	9585
8	Chr11_8_CIR316_00004	gnl|BGIA2|CA_chr4	97.64	4285	84	12	18392	22664	130719670	130723949	0	7337
8	Chr11_8_CIR316_00004	gnl|BGIA2|CA_chr4	97.67	1849	35	5	16556	18399	130706194	130708039	0	3169
8	Chr11_8_CIR316_00004	gnl|BGIA2|CA_chr4	94.93	612	8	1	13024	13612	130705558	130706169	0	937
8	Chr11_8_CIR316_00004	gnl|BGIA2|CA_chr4	97.01	13101	191	63	61	13019	130692451	130705492	0	21835
8	Chr11_8_CIR316_00003	gnl|BGIA2|CA_chr4	98.22	1066	13	6	5523	6584	130691394	130692457	0	1858
8	Chr11_8_CIR316_00003	gnl|BGIA2|CA_chr4	96.31	2113	54	10	3434	5528	130686392	130688498	0	3448
8	Chr11_8_CIR316_00003	gnl|BGIA2|CA_chr4	97.09	3955	67	19	1	3927	130682455	130686389	0	6623
8	Chr11_8_CIR316_00001	gnl|BGIA2|CA_chr4	98.46	30418	306	64	4	30296	130682452	130652071	0	53435
8	Chr11_8_CIR316_00001	gnl|BGIA2|CA_chr4	98.28	7035	102	7	30345	37362	130652070	130645038	0	12303
8	Chr11_8_CIR316_00001	gnl|BGIA2|CA_chr4	97.45	4271	62	21	37456	41700	130645040	130640791	0	7239
8	Chr11_8_CIR316_00002	gnl|BGIA2|CA_chr4	92.24	1391	53	23	1	1349	130640783	130639406	0	1919
8	Chr11_8_CIR316_00002	gnl|BGIA2|CA_chr4	98.23	3387	51	5	1339	4720	130639473	130636091	0	5914
8	Chr11_8_CIR316_00002	gnl|BGIA2|CA_chr4	95.84	1729	48	9	5110	6819	130636096	130634373	0	2772
8	Chr11_8_CIR316_00002	gnl|BGIA2|CA_chr4	96.51	887	27	3	6819	7705	130634461	130633579	0	1463
6	Chr11_6_UCR61_00023	gnl|BGIA2|CA_chr4	95.94	320	11	2	782	1100	130630807	130631125	2e-144	518
6	Chr11_6_UCR61_00023	gnl|BGIA2|CA_chr4	95.94	320	11	2	782	1100	130628981	130629299	2e-144	518
6	Chr11_6_UCR61_00011	gnl|BGIA2|CA_chr4	91.92	458	29	4	2823	3273	130625253	130624797	1e-178	634
6	Chr11_6_UCR61_00011	gnl|BGIA2|CA_chr4	92.55	537	40	0	4268	4804	130621480	130620944	0	771
6	Chr11_6_UCR61_00009	gnl|BGIA2|CA_chr4	91.9	457	29	6	1	454	130618974	130619425	2e-179	632
6	Chr11_6_UCR61_00019	gnl|BGIA2|CA_chr4	90.47	913	55	9	293	1175	130603632	130604542	0	1175
6	Chr11_6_UCR61_00005	gnl|BGIA2|CA_chr4	92.42	1913	137	4	18	1926	130599024	130597116	0	2723
6	Chr11_6_UCR61_00020	gnl|BGIA2|CA_chr4	91.03	970	78	8	13	976	130596859	130595893	0	1301
6	Chr11_6_UCR61_00034	gnl|BGIA2|CA_chr4	90.93	2106	136	22	1	2096	130596411	130594351	0	2780
6	Chr11_6_UCR61_00021	gnl|BGIA2|CA_chr4	93.68	712	35	6	11941	12645	130595640	130594932	0	1057
6	Chr11_6_UCR61_00038	gnl|BGIA2|CA_chr4	91.29	1814	104	25	835	2614	130595290	130593497	0	2425
6	Chr11_6_UCR61_00001	gnl|BGIA2|CA_chr4	90.46	1227	69	15	3	1207	130594134	130595334	0	1578
7	Chr11_7_MUSB1076_00028	gnl|BGIA2|CA_chr4	98.68	682	7	1	10349	11028	130529250	130529931	0	1208
7	Chr11_7_MUSB1076_00028	gnl|BGIA2|CA_chr4	99.4	167	0	1	10173	10338	130529140	130529306	2e-78	302
7	Chr11_7_MUSB1076_00028	gnl|BGIA2|CA_chr4	99.01	2322	20	1	7779	10097	130526873	130529194	0	4157
7	Chr11_7_MUSB1076_00028	gnl|BGIA2|CA_chr4	97.38	1490	11	4	6232	7706	130525448	130526924	0	2510
7	Chr11_7_MUSB1076_00028	gnl|BGIA2|CA_chr4	97.96	6141	101	6	1	6141	130519268	130525384	0	10626
7	Chr11_7_MUSB1076_00012	gnl|BGIA2|CA_chr4	97.52	685	16	1	1	685	130519263	130518580	0	1170
7	Chr11_7_MUSB1076_00012	gnl|BGIA2|CA_chr4	98.46	15878	199	16	696	16539	130518635	130502770	0	27922
7	Chr11_7_MUSB1076_00012	gnl|BGIA2|CA_chr4	97.6	3088	54	8	16540	19609	130502846	130499761	0	5275
7	Chr11_7_MUSB1076_00012	gnl|BGIA2|CA_chr4	95.4	1652	68	6	19684	21330	130499737	130498089	0	2623
7	Chr11_7_MUSB1076_00014	gnl|BGIA2|CA_chr4	91.92	2882	161	32	8364	11189	130495232	130498097	0	3965
7	Chr11_7_MUSB1076_00014	gnl|BGIA2|CA_chr4	91.98	1746	86	16	1081	2788	130491281	130493010	0	2399
7	Chr11_7_MUSB1076_00001	gnl|BGIA2|CA_chr4	95.48	5423	209	17	63	5465	130490237	130484831	0	8624
7	Chr11_7_MUSB1076_00014	gnl|BGIA2|CA_chr4	95.13	1027	49	1	58	1084	130490229	130491254	0	1618
7	Chr11_7_MUSB1076_00001	gnl|BGIA2|CA_chr4	91.44	596	35	7	5554	6139	130484834	130484245	0	804
7	Chr11_7_MUSB1076_00001	gnl|BGIA2|CA_chr4	97.27	3589	58	13	15069	18648	130466256	130462699	0	6050
6	Chr11_6_UCR61_00013	gnl|BGIA2|CA_chr4	97.23	1338	26	6	5953	7284	130393630	130394962	0	2255
6	Chr11_6_UCR61_00013	gnl|BGIA2|CA_chr4	93.87	2514	105	20	4259	6737	130389423	130391922	0	3744
6	Chr11_6_UCR61_00013	gnl|BGIA2|CA_chr4	95.88	729	25	5	3448	4171	130388698	130389426	0	1175
6	Chr11_6_UCR61_00013	gnl|BGIA2|CA_chr4	96.15	545	20	1	2771	3314	130386818	130387362	0	889
6	Chr11_6_UCR61_00013	gnl|BGIA2|CA_chr4	90.83	927	55	17	1489	2411	130385811	130386711	0	1214
6	Chr11_6_UCR61_00013	gnl|BGIA2|CA_chr4	95.75	1599	51	9	1	1587	130384274	130385867	0	2560
6	Chr11_6_UCR61_00006	gnl|BGIA2|CA_chr4	90.1	677	65	2	1709	2384	130375811	130376486	0	878
6	Chr11_6_UCR61_00060	gnl|BGIA2|CA_chr4	91.78	1301	86	9	15534	16834	130344569	130343290	0	1790
6	Chr11_6_UCR61_00060	gnl|BGIA2|CA_chr4	90.98	2261	156	11	19014	21234	130343289	130341037	0	3001
6	Chr11_6_UCR61_00060	gnl|BGIA2|CA_chr4	95.65	2760	84	13	1755	4509	130342731	130340003	0	4399
6	Chr11_6_UCR61_00060	gnl|BGIA2|CA_chr4	94.87	5696	180	34	2750	8384	130334113	130328469	0	8798
6	Chr11_6_UCR61_00029	gnl|BGIA2|CA_chr4	97.41	463	11	1	125	586	130323201	130323663	0	787
5	Chr11_5_UCR91_00002	gnl|BGIA2|CA_chr4	94.36	2588	57	23	3349	5885	130265907	130268456	0	3888
5	Chr11_5_UCR91_00002	gnl|BGIA2|CA_chr4	97.7	2215	38	5	1033	3242	130263642	130265848	0	3795
5	Chr11_5_UCR91_00002	gnl|BGIA2|CA_chr4	92.31	1014	58	12	7	1005	130262645	130263653	0	1423
5	Chr11_5_UCR91_00001	gnl|BGIA2|CA_chr4	98.67	1356	16	2	30	1384	130262529	130261175	0	2403
5	Chr11_5_UCR91_00001	gnl|BGIA2|CA_chr4	98.28	6855	98	10	1418	8259	130261140	130254293	0	12009
5	Chr11_5_UCR91_00010	gnl|BGIA2|CA_chr4	93.04	158	10	1	6	162	130260010	130260167	1e-58	230
5	Chr11_5_UCR91_00001	gnl|BGIA2|CA_chr4	96.97	3695	68	16	8250	11924	130254239	130250569	0	6163
5	Chr11_5_UCR91_00007	gnl|BGIA2|CA_chr4	96.63	445	5	5	1840	2282	130250870	130251306	0	730
5	Chr11_5_UCR91_00001	gnl|BGIA2|CA_chr4	95.1	2224	67	13	11922	14109	130250197	130247980	0	3465
5	Chr11_5_UCR91_00001	gnl|BGIA2|CA_chr4	97.26	1717	20	6	14183	15874	130247979	130246265	0	2885
5	Chr11_5_UCR91_00001	gnl|BGIA2|CA_chr4	98.14	11859	145	16	15857	27674	130245901	130234077	0	20611
5	Chr11_5_UCR91_00001	gnl|BGIA2|CA_chr4	98.51	6460	66	7	27671	34129	130228106	130221676	0	11370
5	Chr11_5_UCR91_00001	gnl|BGIA2|CA_chr4	99.05	5385	47	3	34665	40046	130221680	130216297	0	9659
5	Chr11_5_UCR91_00006	gnl|BGIA2|CA_chr4	98.58	4000	37	7	1	3994	130213458	130209473	0	7053
5	Chr11_5_UCR91_00003	gnl|BGIA2|CA_chr4	98.29	2756	36	7	1	2751	130213409	130216158	0	4819
5	Chr11_5_UCR91_00001	gnl|BGIA2|CA_chr4	90.49	2998	269	9	34665	37656	130206934	130203947	0	3943
4	Chr11_4_UCR102_00003	gnl|BGIA2|CA_chr4	96.28	5299	116	25	2495	7759	129996760	129991509	0	8619
4	Chr11_4_UCR102_00003	gnl|BGIA2|CA_chr4	94.07	506	25	4	1441	1945	129995573	129995072	0	763
4	Chr11_4_UCR102_00003	gnl|BGIA2|CA_chr4	95.47	4550	106	29	7793	12300	129979269	129974778	0	7169
4	Chr11_4_UCR102_00003	gnl|BGIA2|CA_chr4	91.41	1549	84	24	12300	13806	129974740	129973199	0	2078
4	Chr11_4_UCR102_00003	gnl|BGIA2|CA_chr4	96.55	840	19	6	1	838	129973256	129972425	0	1382
4	Chr11_4_UCR102_00003	gnl|BGIA2|CA_chr4	97.13	244	7	0	880	1123	129972431	129972188	1e-111	412
4	Chr11_4_UCR102_00001	gnl|BGIA2|CA_chr4	96.54	5463	106	24	854	6281	129970271	129964857	0	8964
4	Chr11_4_UCR102_00002	gnl|BGIA2|CA_chr4	95.51	735	26	6	4129	4859	129966085	129965354	0	1168
4	Chr11_4_UCR102_00002	gnl|BGIA2|CA_chr4	97.03	740	8	2	1	740	129965464	129964739	0	1232
4	Chr11_4_UCR102_00002	gnl|BGIA2|CA_chr4	95.94	2909	75	14	908	3814	129964715	129961848	0	4678
4	Chr11_4_UCR102_00002	gnl|BGIA2|CA_chr4	96.94	294	9	0	3816	4109	129961886	129961593	1e-136	494
4	Chr11_4_UCR102_00001	gnl|BGIA2|CA_chr4	95.56	6627	132	41	5263	11848	129961596	129955091	0	10460
4	Chr11_4_UCR102_00001	gnl|BGIA2|CA_chr4	95.9	1708	64	4	15655	17362	129954833	129953132	0	2761
4	Chr11_4_UCR102_00001	gnl|BGIA2|CA_chr4	90.61	3185	176	46	19775	22907	129946606	129943493	0	4111
4	Chr11_4_UCR102_00001	gnl|BGIA2|CA_chr4	98.16	6026	84	11	23454	29457	129936000	129929980	0	10488
3	Chr11_3_UCR108_00005	gnl|BGIA2|CA_chr4	97.98	7435	115	13	16	7420	129877517	129884946	0	12866
3	Chr11_3_UCR108_00004	gnl|BGIA2|CA_chr4	98.03	3001	53	5	6895	9891	129874156	129877154	0	5210
3	Chr11_3_UCR108_00004	gnl|BGIA2|CA_chr4	98.29	993	17	0	6141	7133	129873040	129874032	0	1740
3	Chr11_3_UCR108_00004	gnl|BGIA2|CA_chr4	98.07	4858	61	12	1321	6146	129865115	129869971	0	8419
3	Chr11_3_UCR108_00012	gnl|BGIA2|CA_chr4	92.03	1179	54	14	4	1154	129864439	129865605	0	1620
3	Chr11_3_UCR108_00004	gnl|BGIA2|CA_chr4	98.73	1257	14	2	1	1257	129863824	129865078	0	2231
3	Chr11_3_UCR108_00003	gnl|BGIA2|CA_chr4	96.75	677	20	2	1	676	129863799	129863124	0	1127
3	Chr11_3_UCR108_00003	gnl|BGIA2|CA_chr4	95.42	938	33	5	573	1501	129863268	129862332	0	1485
3	Chr11_3_UCR108_00003	gnl|BGIA2|CA_chr4	93.64	220	6	3	1481	1698	129862457	129862244	3e-84	322
3	Chr11_3_UCR108_00003	gnl|BGIA2|CA_chr4	97.93	145	3	0	1729	1873	129862255	129862111	4e-63	252
3	Chr11_3_UCR108_00003	gnl|BGIA2|CA_chr4	94.08	3126	113	13	1881	4978	129862070	129858989	0	4682
3	Chr11_3_UCR108_00003	gnl|BGIA2|CA_chr4	94.61	1373	49	13	4971	6333	129857937	129856580	0	2102
3	Chr11_3_UCR108_00003	gnl|BGIA2|CA_chr4	95.22	4765	138	31	9453	14199	129838165	129833473	0	7454
3	Chr11_3_UCR108_00003	gnl|BGIA2|CA_chr4	94.33	6881	282	63	14102	20930	129833739	129826915	0	10447
3	Chr11_3_UCR108_00003	gnl|BGIA2|CA_chr4	91.3	989	56	4	21000	21987	129821561	129820602	0	1323
3	Chr11_3_UCR108_00003	gnl|BGIA2|CA_chr4	93.64	1290	62	15	22052	23334	129820604	129819328	0	1910
3	Chr11_3_UCR108_00002	gnl|BGIA2|CA_chr4	95.89	1168	28	5	2	1154	129818428	129817266	0	1873
3	Chr11_3_UCR108_00002	gnl|BGIA2|CA_chr4	92.05	1962	103	25	1862	3809	129817269	129815347	0	2710
2	Chr11_2_CIR069_00003	gnl|BGIA2|CA_chr4	97.96	2401	37	7	28746	31135	129768824	129771223	0	4152
2	Chr11_2_CIR069_00003	gnl|BGIA2|CA_chr4	97.79	1133	23	2	25719	26850	129766458	129767589	0	1953
2	Chr11_2_CIR069_00003	gnl|BGIA2|CA_chr4	96.61	6134	100	25	19487	25561	129760373	129766457	0	10076
2	Chr11_2_CIR069_00003	gnl|BGIA2|CA_chr4	98.23	8176	78	25	11369	19495	129752181	129760338	0	14233
2	Chr11_2_CIR069_00003	gnl|BGIA2|CA_chr4	94.82	560	24	4	10790	11346	129751635	129752192	0	869
2	Chr11_2_CIR069_00003	gnl|BGIA2|CA_chr4	97.12	10791	171	37	52	10789	129740834	129751537	0	18076
2	Chr11_2_CIR069_00005	gnl|BGIA2|CA_chr4	99.08	8022	43	13	297	8292	129732689	129740705	0	14375
2	Chr11_2_CIR069_00005	gnl|BGIA2|CA_chr4	97.06	272	6	2	1	271	129732439	129732709	3e-125	457
2	Chr11_2_CIR069_00008	gnl|BGIA2|CA_chr4	97.7	174	3	1	1	173	129731728	129731555	3e-79	298
2	Chr11_2_CIR069_00001	gnl|BGIA2|CA_chr4	97.3	6435	152	11	409	6829	129724018	129730444	0	10900
2	Chr11_2_CIR069_00001	gnl|BGIA2|CA_chr4	96.41	446	13	2	99	542	129723672	129724116	0	732
2	Chr11_2_CIR069_00004	gnl|BGIA2|CA_chr4	95.71	4268	84	12	1	4187	129718697	129722946	0	6776
2	Chr11_2_CIR069_00006	gnl|BGIA2|CA_chr4	96.03	2848	63	12	1	2809	129718680	129715844	0	4588
2	Chr11_2_CIR069_00002	gnl|BGIA2|CA_chr4	97.85	4284	68	9	1234	5495	129707739	129712020	0	7380
2	Chr11_2_CIR069_00002	gnl|BGIA2|CA_chr4	99.34	1054	6	1	1	1054	129706693	129707745	0	1906
1	Chr11_1_BNL2650_00002	gnl|BGIA2|CA_chr4	95.96	1187	12	8	27835	28986	129109941	129111126	0	1893
1	Chr11_1_BNL2650_00002	gnl|BGIA2|CA_chr4	99.12	4775	33	7	23069	27836	129105226	129109998	0	8576
1	Chr11_1_BNL2650_00002	gnl|BGIA2|CA_chr4	97.61	3178	61	9	19912	23075	129102104	129105280	0	5433
1	Chr11_1_BNL2650_00002	gnl|BGIA2|CA_chr4	98.21	782	12	2	19136	19915	129101387	129102168	0	1365
1	Chr11_1_BNL2650_00002	gnl|BGIA2|CA_chr4	99.16	11882	68	14	7276	19139	129088850	129100717	0	21359
1	Chr11_1_BNL2650_00002	gnl|BGIA2|CA_chr4	99.1	4325	28	3	2962	7276	129084498	129088821	0	7760
1	Chr11_1_BNL2650_00002	gnl|BGIA2|CA_chr4	98.82	510	6	0	2456	2965	129066161	129066670	0	909
1	Chr11_1_BNL2650_00002	gnl|BGIA2|CA_chr4	98.21	1060	14	2	1400	2459	129065060	129066114	0	1847
1	Chr11_1_BNL2650_00003	gnl|BGIA2|CA_chr4	99.16	14019	82	15	4	14003	129051064	129065065	0	25202
21	Chr11_21_DPL0325_00001	gnl|BGIA2|CA_chr4	98.96	2603	20	3	7947	10545	127154337	127156936	0	4650
21	Chr11_21_DPL0325_00001	gnl|BGIA2|CA_chr4	95.29	2525	35	18	5400	7843	127151765	127154286	0	3927
21	Chr11_21_DPL0325_00001	gnl|BGIA2|CA_chr4	92.68	779	8	15	4643	5377	127150908	127151681	0	1077
21	Chr11_21_DPL0325_00001	gnl|BGIA2|CA_chr4	94.05	1916	34	27	2803	4648	127134541	127136446	0	2833
21	Chr11_21_DPL0325_00001	gnl|BGIA2|CA_chr4	97.43	1831	18	8	898	2725	127132787	127134591	0	3094
21	Chr11_21_DPL0325_00001	gnl|BGIA2|CA_chr4	98.72	623	0	2	56	671	127131984	127132605	0	1099
21	Chr11_21_DPL0325_00002	gnl|BGIA2|CA_chr4	97.75	11011	173	24	35567	46555	127121026	127131983	0	18890
21	Chr11_21_DPL0325_00002	gnl|BGIA2|CA_chr4	97.44	3365	79	5	32216	35576	127117845	127121206	0	5731
21	Chr11_21_DPL0325_00002	gnl|BGIA2|CA_chr4	98.16	2502	39	2	29687	32181	127115344	127117845	0	4359
21	Chr11_21_DPL0325_00002	gnl|BGIA2|CA_chr4	97.64	4500	76	16	24983	29466	127110823	127115308	0	7697
21	Chr11_21_DPL0325_00002	gnl|BGIA2|CA_chr4	96.58	1869	22	17	23143	24986	127108911	127110762	0	3059
21	Chr11_21_DPL0325_00002	gnl|BGIA2|CA_chr4	97.32	5006	54	27	18174	23130	127103376	127108350	0	8431
21	Chr11_21_DPL0325_00002	gnl|BGIA2|CA_chr4	98.54	18193	128	31	1	18099	127085281	127103429	0	31999
14	Chr11_14_BNL3279_00001	gnl|BGIA2|CA_chr4	92.22	1234	83	7	18097	19320	126420228	126418998	0	1735
14	Chr11_14_BNL3279_00001	gnl|BGIA2|CA_chr4	90.19	979	59	17	19139	20089	126418997	126418028	0	1242
14	Chr11_14_BNL3279_00001	gnl|BGIA2|CA_chr4	91.63	4096	253	25	20131	24193	126418028	126413990	0	5581
14	Chr11_14_BNL3279_00009	gnl|BGIA2|CA_chr4	97.13	314	8	1	6	319	126068238	126068550	2e-148	529
14	Chr11_14_BNL3279_00013	gnl|BGIA2|CA_chr4	93.05	1065	43	6	6	1067	126068238	126069274	0	1528
14	Chr11_14_BNL3279_00010	gnl|BGIA2|CA_chr4	91.08	2714	223	15	1962	4659	126063642	126066352	0	3653
16	Chr11_16_NAU6507_00018	gnl|BGIA2|CA_chr4	98.25	686	10	1	403	1086	120914354	120915039	0	1199
16	Chr11_16_NAU6507_00017	gnl|BGIA2|CA_chr4	98.82	4659	34	5	2198	6837	120909701	120914357	0	8279
16	Chr11_16_NAU6507_00017	gnl|BGIA2|CA_chr4	97.92	2215	32	9	1	2201	120907550	120909764	0	3823
16	Chr11_16_NAU6507_00016	gnl|BGIA2|CA_chr4	95.72	584	8	4	3432	4000	120906902	120907483	0	924
16	Chr11_16_NAU6507_00016	gnl|BGIA2|CA_chr4	98.14	2904	46	6	505	3401	120903909	120906811	0	5057
16	Chr11_16_NAU6507_00016	gnl|BGIA2|CA_chr4	97.5	240	4	2	175	414	120903617	120903854	4e-111	409
16	Chr11_16_NAU6507_00009	gnl|BGIA2|CA_chr4	96.74	2788	72	11	6108	8886	120900844	120903621	0	4626
16	Chr11_16_NAU6507_00022	gnl|BGIA2|CA_chr4	92.8	125	8	1	330	454	120900725	120900602	4e-43	180
16	Chr11_16_NAU6507_00016	gnl|BGIA2|CA_chr4	98.28	174	3	0	1	174	120900679	120900852	5e-80	305
16	Chr11_16_NAU6507_00019	gnl|BGIA2|CA_chr4	97.75	666	13	2	1	664	120900500	120899835	0	1146
16	Chr11_16_NAU6507_00023	gnl|BGIA2|CA_chr4	97.86	187	4	0	1	187	120900477	120900663	6e-87	324
16	Chr11_16_NAU6507_00014	gnl|BGIA2|CA_chr4	98.26	230	3	1	1	230	120900127	120900355	3e-110	401
16	Chr11_16_NAU6507_00015	gnl|BGIA2|CA_chr4	97.9	524	8	2	526	1048	120899835	120900356	0	904
16	Chr11_16_NAU6507_00015	gnl|BGIA2|CA_chr4	96.43	112	4	0	1	112	120899734	120899845	2e-44	185
16	Chr11_16_NAU6507_00020	gnl|BGIA2|CA_chr4	97.34	1355	36	0	1	1355	120899723	120898369	0	2303
16	Chr11_16_NAU6507_00012	gnl|BGIA2|CA_chr4	96.91	162	5	0	1	162	120898394	120898555	2e-71	272
16	Chr11_16_NAU6507_00006	gnl|BGIA2|CA_chr4	95.68	162	7	0	1	162	120898394	120898555	4e-68	261
16	Chr11_16_NAU6507_00020	gnl|BGIA2|CA_chr4	95.46	441	19	1	1384	1823	120898368	120897928	0	702
16	Chr11_16_NAU6507_00011	gnl|BGIA2|CA_chr4	96.57	350	9	1	1	347	120898019	120898368	9e-163	577
16	Chr11_16_NAU6507_00021	gnl|BGIA2|CA_chr4	96.13	181	7	0	1	181	120897089	120897269	1e-78	296
16	Chr11_16_NAU6507_00010	gnl|BGIA2|CA_chr4	98.82	1266	15	0	182	1447	120896707	120897972	0	2255
16	Chr11_16_NAU6507_00018	gnl|BGIA2|CA_chr4	96.57	175	5	1	1166	1340	120896452	120896279	2e-75	289
16	Chr11_16_NAU6507_00023	gnl|BGIA2|CA_chr4	97.86	187	4	0	1	187	120896139	120896325	6e-87	324
16	Chr11_16_NAU6507_00009	gnl|BGIA2|CA_chr4	98.41	63	1	0	8886	8948	120895966	120896028	3e-21	111
16	Chr11_16_NAU6507_00009	gnl|BGIA2|CA_chr4	98.34	241	2	1	5882	6120	120895726	120895966	1e-114	422
16	Chr11_16_NAU6507_00005	gnl|BGIA2|CA_chr4	99.12	679	6	0	197	875	120889810	120889132	0	1221
16	Chr11_16_NAU6507_00009	gnl|BGIA2|CA_chr4	98.32	5850	73	9	61	5888	120889805	120895651	0	10237
16	Chr11_16_NAU6507_00004	gnl|BGIA2|CA_chr4	98.33	12526	159	21	1	12495	120875174	120887680	0	21928
16	Chr11_16_NAU6507_00003	gnl|BGIA2|CA_chr4	99.03	1029	7	3	1	1027	120874153	120875180	0	1842
16	Chr11_16_NAU6507_00002	gnl|BGIA2|CA_chr4	95.1	4428	94	52	728	5084	120869837	120874212	0	6861
16	Chr11_16_NAU6507_00002	gnl|BGIA2|CA_chr4	95.82	598	14	7	57	651	120869299	120869888	0	955
16	Chr11_16_NAU6507_00001	gnl|BGIA2|CA_chr4	97.77	7045	148	7	895	7932	120862318	120869360	0	12131
16	Chr11_16_NAU6507_00001	gnl|BGIA2|CA_chr4	97.23	902	24	1	7	908	120850659	120851559	0	1526
16	Chr11_16_NAU6507_00017	gnl|BGIA2|CA_chr4	96.08	102	3	1	3444	3545	120849248	120849348	2e-37	165
18	Chr11_18_Gh300_00004	gnl|BGIA2|CA_chr4	98.45	2127	19	7	7252	9365	112488625	112486500	0	3733
18	Chr11_18_Gh300_00004	gnl|BGIA2|CA_chr4	98.95	9849	75	16	9439	19273	112486462	112476628	0	17592
18	Chr11_18_Gh300_00003	gnl|BGIA2|CA_chr4	98.05	1387	24	2	1	1385	112476634	112475249	0	2409
18	Chr11_18_Gh300_00001	gnl|BGIA2|CA_chr4	98.43	11756	133	20	1	11729	112475256	112463526	0	20637
18	Chr11_18_Gh300_00001	gnl|BGIA2|CA_chr4	98.07	16640	233	30	12885	29477	112463532	112446934	0	28869
18	Chr11_18_Gh300_00002	gnl|BGIA2|CA_chr4	98.13	9150	115	23	1	9131	112446695	112437583	0	15898
18	Chr11_18_Gh300_00002	gnl|BGIA2|CA_chr4	97.68	7644	121	23	9371	16971	112437583	112429953	0	13084
18	Chr11_18_Gh300_00004	gnl|BGIA2|CA_chr4	90.8	1044	74	8	2894	3922	112434728	112435764	0	1376
18	Chr11_18_Gh300_00002	gnl|BGIA2|CA_chr4	96.73	8325	237	11	16982	25288	112429920	112421613	0	13834
20	Chr11_20_NAU3115_00001	gnl|BGIA2|CA_chr4	97.93	2276	40	5	63600	65871	111218454	111220726	0	3936
20	Chr11_20_NAU3115_00001	gnl|BGIA2|CA_chr4	98.44	450	3	2	63144	63589	111218054	111218503	0	789
20	Chr11_20_NAU3115_00001	gnl|BGIA2|CA_chr4	99.2	6886	51	3	56195	63079	111211124	111218006	0	12408
20	Chr11_20_NAU3115_00001	gnl|BGIA2|CA_chr4	98.48	12302	138	17	38819	51102	111198859	111211129	0	21636
20	Chr11_20_NAU3115_00001	gnl|BGIA2|CA_chr4	99.04	7922	47	14	30918	38825	111190809	111198715	0	14181
20	Chr11_20_NAU3115_00001	gnl|BGIA2|CA_chr4	97.99	4576	42	14	26386	30928	111181520	111186078	0	7895
20	Chr11_20_NAU3115_00001	gnl|BGIA2|CA_chr4	97.93	1883	34	4	21525	23406	111179648	111181526	0	3256
20	Chr11_20_NAU3115_00001	gnl|BGIA2|CA_chr4	97.95	11125	112	32	10441	21511	111168633	111179695	0	19174
20	Chr11_20_NAU3115_00001	gnl|BGIA2|CA_chr4	97.14	2865	33	9	9383	12210	111165783	111168635	0	4791
20	Chr11_20_NAU3115_00001	gnl|BGIA2|CA_chr4	97.94	4413	63	12	4991	9382	111161337	111165742	0	7620
20	Chr11_20_NAU3115_00001	gnl|BGIA2|CA_chr4	98.07	674	9	3	4336	5008	111160583	111161253	0	1170
20	Chr11_20_NAU3115_00001	gnl|BGIA2|CA_chr4	99.3	4264	22	2	72	4327	111156348	111160611	0	7701
12	Chr11_12_BNL1231_00002	gnl|BGIA2|CA_chr4	96.82	4248	133	2	1	4247	104994181	104998427	0	7095
12	Chr11_12_BNL1231_00001	gnl|BGIA2|CA_chr4	90.19	1784	152	13	15264	17043	104915784	104917548	0	2303
12	Chr11_12_BNL1231_00001	gnl|BGIA2|CA_chr4	95.14	5963	250	14	59	5986	104855523	104849566	0	9369
12	Chr11_12_BNL1231_00001	gnl|BGIA2|CA_chr4	95.66	1567	65	3	5943	7506	104849566	104848000	0	2514
12	Chr11_12_BNL1231_00001	gnl|BGIA2|CA_chr4	96.74	4112	82	14	7697	11773	104847902	104843808	0	6804
12	Chr11_12_BNL1231_00001	gnl|BGIA2|CA_chr4	98.2	4393	60	6	12284	16670	104843327	104838948	0	7657
12	Chr11_12_BNL1231_00010	gnl|BGIA2|CA_chr4	99.36	466	3	0	2	467	104837902	104837437	0	845
12	Chr11_12_BNL1231_00010	gnl|BGIA2|CA_chr4	98.08	208	3	1	509	716	104837433	104837227	2e-97	361
12	Chr11_12_BNL1231_00011	gnl|BGIA2|CA_chr4	98.65	222	3	0	58	279	104837006	104837227	8e-108	394
12	Chr11_12_BNL1231_00006	gnl|BGIA2|CA_chr4	98.88	1867	17	3	1	1863	104829785	104827919	0	3328
12	Chr11_12_BNL1231_00003	gnl|BGIA2|CA_chr4	98.14	11761	175	20	3	11743	104827925	104816189	0	20465
12	Chr11_12_BNL1231_00003	gnl|BGIA2|CA_chr4	99.07	4213	28	6	11910	16113	104816185	104811975	0	7553
12	Chr11_12_BNL1231_00015	gnl|BGIA2|CA_chr4	90.69	1740	153	7	3352	5086	104812610	104810875	0	2307
12	Chr11_12_BNL1231_00019	gnl|BGIA2|CA_chr4	97.17	4527	114	8	14003	18516	104810589	104806064	0	7638
12	Chr11_12_BNL1231_00005	gnl|BGIA2|CA_chr4	97.55	245	6	0	2	246	104804702	104804458	3e-114	420
12	Chr11_12_BNL1231_00005	gnl|BGIA2|CA_chr4	99	1298	13	0	247	1544	104803165	104804462	0	2326
12	Chr11_12_BNL1231_00007	gnl|BGIA2|CA_chr4	97.59	3894	80	5	1	3891	104803163	104799281	0	6658
12	Chr11_12_BNL1231_00007	gnl|BGIA2|CA_chr4	96.42	2402	57	16	3883	6265	104799257	104796866	0	3932
12	Chr11_12_BNL1231_00008	gnl|BGIA2|CA_chr4	96.58	263	9	0	2126	2388	104796590	104796852	1e-119	436
12	Chr11_12_BNL1231_00004	gnl|BGIA2|CA_chr4	97.65	1573	19	4	13	1583	104793533	104791977	0	2684
12	Chr11_12_BNL1231_00008	gnl|BGIA2|CA_chr4	98.57	2024	13	3	13	2022	104793517	104795538	0	3563
12	Chr11_12_BNL1231_00004	gnl|BGIA2|CA_chr4	97.34	7076	90	25	1598	8591	104792024	104784965	0	11939
12	Chr11_12_BNL1231_00004	gnl|BGIA2|CA_chr4	95.48	4401	108	36	8674	13012	104784882	104780511	0	6942
12	Chr11_12_BNL1231_00012	gnl|BGIA2|CA_chr4	90.25	1405	119	6	12	1408	104749929	104748535	0	1820
12	Chr11_12_BNL1231_00015	gnl|BGIA2|CA_chr4	90.03	1455	137	6	7134	8587	104724140	104722693	0	1877
13	Chr11_13_Gh288_00001	gnl|BGIA2|CA_chr4	97.22	3994	93	10	5	3982	104483783	104479792	0	6745
13	Chr11_13_Gh288_00002	gnl|BGIA2|CA_chr4	94.87	1267	41	8	1	1259	104474777	104473527	0	1958
13	Chr11_13_Gh288_00002	gnl|BGIA2|CA_chr4	96.31	2790	62	12	1453	4223	104473519	104470752	0	4543
13	Chr11_13_Gh288_00002	gnl|BGIA2|CA_chr4	96.14	1994	41	10	4247	6222	104470754	104468779	0	3223
13	Chr11_13_Gh288_00002	gnl|BGIA2|CA_chr4	98.74	714	9	0	6418	7131	104468830	104468117	0	1269
13	Chr11_13_Gh288_00003	gnl|BGIA2|CA_chr4	99.08	868	8	0	1	868	104468124	104467257	0	1559
13	Chr11_13_Gh288_00003	gnl|BGIA2|CA_chr4	99.17	6784	34	3	1034	7813	104467256	104460491	0	12198
13	Chr11_13_Gh288_00021	gnl|BGIA2|CA_chr4	93.92	362	19	2	1	361	104460498	104460139	9e-153	544
13	Chr11_13_Gh288_00004	gnl|BGIA2|CA_chr4	98.02	1567	16	3	1	1567	104457561	104456010	0	2708
13	Chr11_13_Gh288_00014	gnl|BGIA2|CA_chr4	97.39	2678	30	17	1	2671	104457500	104460144	0	4521
13	Chr11_13_Gh288_00004	gnl|BGIA2|CA_chr4	98.94	1040	7	2	1437	2475	104455993	104454957	0	1857
13	Chr11_13_Gh288_00005	gnl|BGIA2|CA_chr4	99.18	1217	7	2	1	1217	104454963	104453750	0	2189
13	Chr11_13_Gh288_00006	gnl|BGIA2|CA_chr4	99.12	1583	12	2	1	1582	104453758	104452177	0	2844
13	Chr11_13_Gh288_00016	gnl|BGIA2|CA_chr4	96.25	3360	92	17	34	3381	104452174	104448837	0	5476
13	Chr11_13_Gh288_00016	gnl|BGIA2|CA_chr4	94.73	1196	22	6	3920	5106	104448845	104447682	0	1821
13	Chr11_13_Gh288_00016	gnl|BGIA2|CA_chr4	96.89	1126	31	3	5136	6259	104447684	104446561	0	1882
13	Chr11_13_Gh288_00007	gnl|BGIA2|CA_chr4	97.79	2890	42	14	1	2881	104442514	104439638	0	4963
13	Chr11_13_Gh288_00008	gnl|BGIA2|CA_chr4	99.03	2376	22	1	1	2375	104439645	104437270	0	4259
13	Chr11_13_Gh288_00012	gnl|BGIA2|CA_chr4	98.88	2779	29	2	949	3727	104434501	104437277	0	4959
13	Chr11_13_Gh288_00012	gnl|BGIA2|CA_chr4	93.15	890	18	14	2	882	104433643	104434498	0	1266
13	Chr11_13_Gh288_00011	gnl|BGIA2|CA_chr4	95.78	1469	50	8	5945	7405	104432190	104433654	0	2359
13	Chr11_13_Gh288_00011	gnl|BGIA2|CA_chr4	97.07	4194	91	13	1	4169	104427987	104432173	0	7035
13	Chr11_13_Gh288_00009	gnl|BGIA2|CA_chr4	94.84	465	22	2	1	464	104423844	104423381	0	725
13	Chr11_13_Gh288_00015	gnl|BGIA2|CA_chr4	96.61	4273	82	38	1	4217	104423782	104428047	0	7029
13	Chr11_13_Gh288_00009	gnl|BGIA2|CA_chr4	97.13	4956	102	23	461	5390	104419853	104414912	0	8329
13	Chr11_13_Gh288_00013	gnl|BGIA2|CA_chr4	96.8	4189	106	11	69	4232	104414917	104410732	0	6968
9	Chr11_9_UCR49_00001	gnl|BGIA2|CA_chr4	98.62	7319	63	12	7869	15162	79997152	80004457	0	12922
9	Chr11_9_UCR49_00001	gnl|BGIA2|CA_chr4	99.03	1754	9	6	6193	7941	79995438	79997188	0	3138
9	Chr11_9_UCR49_00001	gnl|BGIA2|CA_chr4	98.11	4331	59	15	1716	6042	79991129	79995440	0	7522
9	Chr11_9_UCR49_00001	gnl|BGIA2|CA_chr4	97.1	1449	39	3	271	1717	79989458	79990905	0	2440
9	Chr11_9_UCR49_00002	gnl|BGIA2|CA_chr4	96.61	1532	31	11	39779	41306	79987946	79989460	0	2521
9	Chr11_9_UCR49_00002	gnl|BGIA2|CA_chr4	96.27	6730	113	38	33009	39688	79981258	79987899	0	10911
9	Chr11_9_UCR49_00002	gnl|BGIA2|CA_chr4	97.26	3138	56	14	29768	32886	79978127	79981253	0	5291
9	Chr11_9_UCR49_00002	gnl|BGIA2|CA_chr4	97.97	4915	42	18	24874	29776	79958037	79962905	0	8471
9	Chr11_9_UCR49_00002	gnl|BGIA2|CA_chr4	98.86	703	3	4	24192	24890	79957392	79958093	0	1249
9	Chr11_9_UCR49_00002	gnl|BGIA2|CA_chr4	97.28	2463	29	17	21729	24181	79955009	79957443	0	4143
19	Chr11_19_NAU4962_00010	gnl|BGIA2|CA_chr4	99.1	4642	25	8	433	5067	42254266	42258897	0	8323
19	Chr11_19_NAU4962_00003	gnl|BGIA2|CA_chr4	97.51	2972	53	9	538	3492	42253609	42250642	0	5059
19	Chr11_19_NAU4962_00010	gnl|BGIA2|CA_chr4	96.31	298	5	4	58	349	42253605	42253902	8e-134	484
19	Chr11_19_NAU4962_00003	gnl|BGIA2|CA_chr4	94.31	439	22	3	7456	7892	42250855	42250418	0	669
19	Chr11_19_NAU4962_00003	gnl|BGIA2|CA_chr4	98.36	5049	81	2	3480	8528	42250453	42245407	0	8863
19	Chr11_19_NAU4962_00003	gnl|BGIA2|CA_chr4	93.95	215	10	3	3280	3492	42246479	42246266	1e-84	322
19	Chr11_19_NAU4962_00004	gnl|BGIA2|CA_chr4	98.62	2099	29	0	22620	24718	42243316	42245414	0	3716
19	Chr11_19_NAU4962_00004	gnl|BGIA2|CA_chr4	98.65	6526	77	10	16105	22620	42236700	42243224	0	11553
19	Chr11_19_NAU4962_00004	gnl|BGIA2|CA_chr4	98.18	714	11	2	15287	15999	42235941	42236653	0	1245
6	Chr11_5_UCR91_00005	gnl|BGIA2|CA_chr4	98.15	4269	73	2	1	4263	32960118	32964386	0	7441
23	Chr11_23_BNL3592_00001	gnl|BGIA2|CA_chr4	97.7	8992	105	29	1037	9947	9400812	9391842	0	15367
23	Chr11_23_BNL3592_00001	gnl|BGIA2|CA_chr4	98.36	9018	132	9	9948	18959	9391649	9382642	0	15825
23	Chr11_23_BNL3592_00001	gnl|BGIA2|CA_chr4	98.34	4279	62	2	20268	24546	9381630	9377361	0	7504
23	Chr11_23_BNL3592_00001	gnl|BGIA2|CA_chr4	97.49	5583	111	12	24357	29928	9377583	9372019	0	9509
23	Chr11_23_BNL3592_00001	gnl|BGIA2|CA_chr4	97.57	3043	64	4	30162	33202	9371991	9368957	0	5201
23	Chr11_23_BNL3592_00001	gnl|BGIA2|CA_chr4	97.26	12100	310	13	33284	45375	9368960	9356874	0	20497
23	Chr11_23_BNL3592_00001	gnl|BGIA2|CA_chr4	97.48	13014	129	45	45021	57869	9356876	9343897	0	22035
23	Chr11_23_BNL3592_00001	gnl|BGIA2|CA_chr4	98.07	1658	14	3	57944	59593	9343950	9342303	0	2868
23	Chr11_23_BNL3592_00001	gnl|BGIA2|CA_chr4	98.15	7025	66	19	59730	66700	9342217	9335203	0	12194
22	Chr11_22_BNL1408_00001	gnl|BGIA2|CA_chr4	97.83	3690	35	12	1	3646	9338567	9334879	0	6329
22	Chr11_22_BNL1408_00001	gnl|BGIA2|CA_chr4	98.46	5834	67	7	3721	9545	9334875	9329056	0	10253
22	Chr11_22_BNL1408_00002	gnl|BGIA2|CA_chr4	98.75	240	3	0	1	240	9328985	9328746	9e-117	427
22	Chr11_22_BNL1408_00002	gnl|BGIA2|CA_chr4	97.35	2453	38	3	237	2670	9327277	9324833	0	4145
22	Chr11_22_BNL1408_00002	gnl|BGIA2|CA_chr4	98.69	535	4	3	2709	3242	9324832	9324300	0	946
22	Chr11_22_BNL1408_00003	gnl|BGIA2|CA_chr4	99.1	4219	26	6	1	4215	9324240	9320030	0	7570
22	Chr11_22_BNL1408_00003	gnl|BGIA2|CA_chr4	96.59	88	3	0	2960	3047	9321368	9321281	4e-32	147
22	Chr11_22_BNL1408_00003	gnl|BGIA2|CA_chr4	96.59	88	3	0	2879	2966	9321287	9321200	4e-32	147
22	Chr11_22_BNL1408_00004	gnl|BGIA2|CA_chr4	98.91	2668	11	2	3	2653	9319943	9317277	0	4750
			96.3833	1014869	19462	3189

## Sheet: Table S31 D5-Chr11
Table S31 The alignment of Chr11 BACs to Gossypium raimondii (D5) (phytozome.net).
# BAC	Query id (BAC name + Congtig number)	Subject id (G. hirsutum mRNA Unigenes)	identity %	alignment length	mismatches	gap openings	q.start	q.end	s.start	s.end	e-value	hit
1	Chr11_1_BNL2650_00003	Chr07	97.96	835	17	0	4	838	60910942	60910108	0	1448
1	Chr11_1_BNL2650_00003	Chr07	93.68	8879	320	85	1182	9984	60909725	60901012	0	13066
1	Chr11_1_BNL2650_00003	Chr07	96.7	4035	103	15	9977	14003	60898683	60894671	0	6687
1	Chr11_1_BNL2650_00002	Chr07	96.41	3146	72	16	3590	6731	60885586	60882478	0	5145
1	Chr11_1_BNL2650_00002	Chr07	96.25	3010	92	8	10311	13312	60882466	60879470	0	4913
1	Chr11_1_BNL2650_00002	Chr07	95.48	2189	58	19	13330	15511	60879376	60877222	0	3456
1	Chr11_1_BNL2650_00002	Chr07	95.91	4500	106	30	15451	19915	60877250	60872794	0	7219
1	Chr11_1_BNL2650_00002	Chr07	97	4094	108	12	23756	27836	60868522	60864431	0	6865
1	Chr11_1_BNL2650_00002	Chr07	95.93	123	5	0	28057	28179	60864175	60864053	9e-48	200
1	Chr11_1_BNL2650_00002	Chr07	95.67	762	18	2	28226	28986	60864055	60863308	0	1210
2	Chr11_2_CIR069_00005	Chr07	96.48	4942	119	20	3389	8306	60385271	60380361	0	8111
2	Chr11_2_CIR069_00003	Chr07	97.8	1542	33	1	52	1593	60380258	60378718	0	2658
2	Chr11_2_CIR069_00003	Chr07	94.5	5947	201	46	1586	7455	60378682	60372785	0	9055
2	Chr11_2_CIR069_00003	Chr07	92.21	1156	39	27	7496	8608	60372788	60371641	0	1589
2	Chr11_2_CIR069_00003	Chr07	90.03	632	41	18	10792	11406	60368713	60368087	0	798
2	Chr11_2_CIR069_00003	Chr07	90.48	882	59	10	11415	12274	60367551	60366673	0	1140
2	Chr11_2_CIR069_00003	Chr07	97.21	2509	61	3	14255	16757	60364178	60361673	0	4237
2	Chr11_2_CIR069_00003	Chr07	90.65	2792	150	60	16759	19488	60361703	60358961	0	3607
3	Chr11_3_UCR108_00002	Chr07	91.04	815	37	13	371	1154	60306988	60307797	0	1068
3	Chr11_3_UCR108_00003	Chr07	93.82	890	33	8	16968	17848	60301760	60302636	0	1319
3	Chr11_3_UCR108_00003	Chr07	92.54	912	43	11	16974	17877	60289353	60290247	0	1284
3	Chr11_3_UCR108_00004	Chr07	95.28	530	23	2	2110	2637	60283239	60282710	0	839
3	Chr11_3_UCR108_00004	Chr07	91.46	1241	57	9	1	1237	60256181	60254986	0	1659
3	Chr11_3_UCR108_00004	Chr07	91.42	676	32	12	1323	1977	60254916	60254246	0	904
3	Chr11_3_UCR108_00004	Chr07	94.14	1246	58	6	4	1247	60240288	60239056	0	1882
3	Chr11_3_UCR108_00010	Chr07	91.12	721	52	9	91	810	60239928	60240637	0	966
3	Chr11_3_UCR108_00012	Chr07	91.9	1198	51	12	4	1168	60239679	60238495	0	1633
3	Chr11_3_UCR108_00011	Chr07	90.48	956	42	15	1261	2172	60237224	60236274	0	1216
3	Chr11_3_UCR108_00011	Chr07	95.97	695	25	3	2183	2875	60236326	60235633	0	1125
4	Chr11_4_UCR102_00001	Chr07	94.09	795	39	6	28664	29453	60214234	60215025	0	1201
4	Chr11_4_UCR102_00001	Chr07	92.92	974	40	10	25191	26150	60199106	60200064	0	1389
4	Chr11_4_UCR102_00001	Chr07	92.7	1068	67	8	21565	22628	60195518	60196578	0	1530
4	Chr11_4_UCR102_00002	Chr07	93.08	737	38	7	1	734	60188128	60188854	0	1066
4	Chr11_4_UCR102_00002	Chr07	92.35	706	43	8	4160	4859	60187535	60188235	0	994
4	Chr11_4_UCR102_00001	Chr07	92.01	1415	81	17	4881	6275	60187339	60188741	0	1958
4	Chr11_4_UCR102_00001	Chr07	94.29	1560	65	15	1871	3424	60185280	60186821	0	2366
4	Chr11_4_UCR102_00003	Chr07	92.69	2833	138	27	8459	11240	60177875	60180689	0	4021
4	Chr11_4_UCR102_00003	Chr07	94.15	1111	57	6	4323	5429	60174322	60175428	0	1685
4	Chr11_4_UCR102_00003	Chr07	93.28	506	29	3	1441	1945	60173352	60173853	0	741
4	Chr11_4_UCR102_00003	Chr07	93.55	1070	43	8	5427	6487	60166487	60167539	0	1570
4	Chr11_4_UCR102_00003	Chr07	94.55	2185	102	9	3258	5429	60164252	60166432	0	3360
5	Chr11_5_UCR91_00001	Chr07	92.11	2546	134	23	20423	22950	60009214	60011710	0	3526
5	Chr11_5_UCR91_00001	Chr07	95.97	3129	100	15	16789	19898	60005502	60008623	0	5057
5	Chr11_5_UCR91_00001	Chr07	93.8	3147	124	24	3774	6882	59990332	59993445	0	4687
5	Chr11_5_UCR91_00001	Chr07	93.79	1369	33	8	1418	2784	59988117	59989435	0	2010
5	Chr11_5_UCR91_00001	Chr07	95.39	1172	37	6	222	1384	59986919	59988082	0	1849
5	Chr11_5_UCR91_00002	Chr07	90.54	592	35	12	1105	1680	59986221	59985635	0	763
5	Chr11_5_UCR91_00002	Chr07	92.81	1516	49	20	1766	3242	59985350	59983856	0	2141
5	Chr11_5_UCR91_00002	Chr07	92.48	2221	92	34	3349	5505	59983797	59981588	0	3107
6	Chr11_6_UCR61_00052	Chr07	91.02	1581	116	11	262	1822	59951976	59950402	0	2109
6	Chr11_6_UCR61_00056	Chr07	93.44	1006	59	7	7161	8160	59950540	59951544	0	1485
6	Chr11_6_UCR61_00052	Chr07	92.84	1048	61	5	1819	2866	59950362	59949329	0	1531
6	Chr11_6_UCR61_00056	Chr07	92.48	785	43	3	6240	7024	59949572	59950340	0	1120
6	Chr11_6_UCR61_00034	Chr07	92.11	748	39	8	1004	1750	59940107	59939379	0	1037
6	Chr11_6_UCR61_00011	Chr07	90.29	618	36	12	1847	2442	59934408	59933793	0	787
6	Chr11_6_UCR61_00002	Chr07	90.71	1431	100	17	828	2234	59933077	59931656	0	1875
6	Chr11_6_UCR61_00001	Chr07	91.9	2086	154	4	1613	3684	59920889	59922973	0	2920
6	Chr11_6_UCR61_00006	Chr07	91.19	681	50	5	1712	2384	59912117	59911439	0	917
6	Chr11_6_UCR61_00034	Chr07	94.82	1140	49	4	1	1132	59911200	59910063	0	1770
6	Chr11_6_UCR61_00007	Chr07	90.38	582	37	8	951	1524	59910675	59911245	0	747
6	Chr11_6_UCR61_00056	Chr07	97.35	528	13	1	843	1369	59908837	59909364	0	896
6	Chr11_6_UCR61_00037	Chr07	96.47	1077	35	3	252	1327	59907828	59908902	0	1775
6	Chr11_6_UCR61_00056	Chr07	93.65	787	39	7	58	843	59907828	59908604	0	1188
6	Chr11_6_UCR61_00023	Chr07	91.43	525	35	7	1	522	59906382	59906899	0	712
6	Chr11_6_UCR61_00060	Chr07	91.39	883	36	9	11731	12587	59899506	59900374	0	1173
6	Chr11_6_UCR61_00036	Chr07	90.57	583	51	2	1	579	59898664	59899246	0	769
6	Chr11_6_UCR61_00060	Chr07	92.81	668	46	1	20448	21113	59889034	59889701	0	966
6	Chr11_6_UCR61_00060	Chr07	91.28	1788	135	11	17222	19003	59886583	59888355	0	2440
6	Chr11_6_UCR61_00002	Chr07	92.35	1373	90	7	1243	2604	59884078	59882710	0	1940
6	Chr11_6_UCR61_00002	Chr07	91.47	551	32	7	4729	5269	59881258	59880713	0	743
6	Chr11_6_UCR61_00005	Chr07	93.68	696	44	0	55	750	59878316	59877621	0	1042
6	Chr11_6_UCR61_00060	Chr07	92.66	695	33	1	19963	20639	59877622	59878316	0	985
6	Chr11_6_UCR61_00056	Chr07	91.73	4088	319	15	1799	5878	59873135	59877211	0	5659
6	Chr11_6_UCR61_00006	Chr07	91.37	1124	73	1	485	1608	59872666	59871567	0	1517
6	Chr11_6_UCR61_00060	Chr07	95.15	1608	76	2	1755	3362	59859388	59860993	0	2536
6	Chr11_6_UCR61_00060	Chr07	90.43	2131	170	9	19016	21114	59858820	59860948	0	2774
6	Chr11_6_UCR61_00060	Chr07	91.4	1815	114	16	17222	19003	59857859	59859664	0	2470
6	Chr11_6_UCR61_00021	Chr07	93.68	601	27	7	12053	12645	59857045	59856448	0	889
7	Chr11_7_MUSB1076_00001	Chr07	90.53	1721	91	28	15351	17057	59717103	59718765	0	2209
7	Chr11_7_MUSB1076_00001	Chr07	90.81	631	30	10	13818	14425	59715337	59715962	0	819
7	Chr11_7_MUSB1076_00014	Chr07	92.02	1027	78	2	58	1084	59704605	59703583	0	1439
7	Chr11_7_MUSB1076_00001	Chr07	92.09	1870	144	4	63	1930	59704597	59706464	0	2630
7	Chr11_7_MUSB1076_00012	Chr07	90.68	676	20	10	20698	21330	59691102	59691777	0	859
7	Chr11_7_MUSB1076_00012	Chr07	90.1	586	44	11	14887	15469	59681203	59681777	0	749
7	Chr11_7_MUSB1076_00012	Chr07	96.24	4758	162	10	9147	13895	59675606	59680355	0	7779
7	Chr11_7_MUSB1076_00028	Chr07	92.3	1324	66	12	6402	7706	59675593	59674287	0	1847
7	Chr11_7_MUSB1076_00028	Chr07	93.69	1839	94	9	7779	9603	59674338	59672508	0	2734
7	Chr11_7_MUSB1076_00001	Chr07	90.18	560	40	7	3371	3926	59648405	59648953	0	715
6	Chr11_6_UCR61_00056	Chr07	95.03	523	25	1	8163	8685	59647328	59646807	0	821
6	Chr11_6_UCR61_00011	Chr07	92.45	1245	64	11	3031	4267	59646805	59648027	0	1751
6	Chr11_6_UCR61_00023	Chr07	91.62	668	34	10	485	1138	59643961	59643302	0	904
6	Chr11_6_UCR61_00056	Chr07	93.93	593	31	5	58	647	59642877	59642287	0	913
6	Chr11_6_UCR61_00019	Chr07	92.31	1093	35	10	3480	4529	59640660	59639574	0	1507
6	Chr11_6_UCR61_00056	Chr07	95.71	1003	40	3	7161	8160	59640443	59639441	0	1611
6	Chr11_6_UCR61_00028	Chr07	92.98	727	36	8	4859	5582	59639095	59638381	0	1046
6	Chr11_6_UCR61_00052	Chr07	95.21	2882	121	5	1	2866	59638743	59641623	0	4566
6	Chr11_6_UCR61_00034	Chr07	95.05	687	32	1	1410	2096	59637909	59638593	0	1079
6	Chr11_6_UCR61_00038	Chr07	91.64	1555	75	8	1096	2616	59637909	59639442	0	2100
6	Chr11_6_UCR61_00001	Chr07	92.85	3620	209	17	1454	5044	59637698	59634100	0	5223
6	Chr11_6_UCR61_00006	Chr07	92.4	1632	97	13	1	1608	59634407	59636035	0	2302
6	Chr11_6_UCR61_00053	Chr07	96.2	815	31	0	1512	2326	59634136	59634950	0	1334
6	Chr11_6_UCR61_00002	Chr07	94.68	526	27	1	6122	6646	59633653	59634178	0	815
6	Chr11_6_UCR61_00011	Chr07	92.87	1360	72	7	5879	7215	59631206	59632563	0	1951
6	Chr11_6_UCR61_00037	Chr07	94.81	559	27	2	252	810	59626384	59625828	0	870
6	Chr11_6_UCR61_00021	Chr07	93.24	710	41	5	11941	12645	59624637	59625344	0	1038
6	Chr11_6_UCR61_00034	Chr07	93.27	1381	80	7	170	1541	59624001	59625377	0	2023
6	Chr11_6_UCR61_00056	Chr07	91.73	1366	80	15	8225	9566	59623582	59622226	0	1866
6	Chr11_6_UCR61_00019	Chr07	95.77	544	23	0	632	1175	59622102	59621559	0	878
6	Chr11_6_UCR61_00011	Chr07	94.65	1495	67	7	2008	3497	59622101	59623587	0	2305
6	Chr11_6_UCR61_00019	Chr07	93.45	1374	61	14	1802	3164	59621423	59620068	0	2012
6	Chr11_6_UCR61_00056	Chr07	91.93	1177	70	8	8163	9320	59620340	59619170	0	1624
6	Chr11_6_UCR61_00056	Chr07	92.4	1618	84	15	10279	11867	59611782	59610175	0	2270
6	Chr11_6_UCR61_00011	Chr07	93.23	1197	66	10	328	1515	59610591	59611781	0	1748
6	Chr11_6_UCR61_00037	Chr07	96.92	519	15	1	810	1327	59608737	59608219	0	869
6	Chr11_6_UCR61_00056	Chr07	97.35	529	12	2	843	1369	59608284	59607756	0	898
6	Chr11_6_UCR61_00056	Chr07	96.46	791	24	1	6240	7030	59607768	59606982	0	1314
6	Chr11_6_UCR61_00001	Chr07	95.43	2188	68	10	1	2166	59605228	59603051	0	3461
8	Chr11_8_CIR316_00001	Chr07	91.35	3721	255	39	20943	24629	59568441	59572128	0	5025
8	Chr11_8_CIR316_00001	Chr07	93.29	4339	183	40	16606	20893	59564160	59568441	0	6301
8	Chr11_8_CIR316_00001	Chr07	96.21	6487	191	23	10031	16499	59557620	59564069	0	10565
8	Chr11_8_CIR316_00001	Chr07	95.22	8119	292	45	1906	9980	59549554	59557620	0	12755
8	Chr11_8_CIR316_00004	Chr07	92.97	569	32	7	6555	7119	59535678	59535114	0	822
8	Chr11_8_CIR316_00004	Chr07	92.41	5083	277	51	7112	12143	59535086	59530062	0	7147
8	Chr11_8_CIR316_00004	Chr07	92.32	846	63	1	12176	13019	59530070	59529225	0	1201
8	Chr11_8_CIR316_00004	Chr07	91.84	613	43	5	16556	17164	59528517	59527908	0	848
8	Chr11_8_CIR316_00004	Chr07	90.09	1140	86	17	17162	18281	59527866	59526734	0	1454
8	Chr11_8_CIR316_00004	Chr07	91.02	1670	132	13	23698	25361	59526738	59525081	0	2237
8	Chr11_8_CIR316_00004	Chr07	90.67	836	64	5	26852	27684	59525905	59525081	0	1099
9	Chr11_9_UCR49_00002	Chr07	92.01	2403	166	19	311	2699	59496003	59493613	0	3350
9	Chr11_9_UCR49_00002	Chr07	92.19	4492	284	33	2703	7178	59487792	59483352	0	6288
9	Chr11_9_UCR49_00002	Chr07	91.59	1236	61	25	9965	11158	59483359	59482125	0	1666
9	Chr11_9_UCR49_00002	Chr07	94.26	3522	141	27	11193	14681	59482125	59478632	0	5328
9	Chr11_9_UCR49_00002	Chr07	91.16	577	29	7	14732	15295	59478643	59478076	0	763
9	Chr11_9_UCR49_00002	Chr07	95.12	4492	151	33	25131	29583	59469564	59465102	0	7020
9	Chr11_9_UCR49_00002	Chr07	92.22	4372	198	59	34322	38631	59458931	59454640	0	6059
9	Chr11_9_UCR49_00001	Chr07	96.13	2014	60	10	1889	3890	59443380	59441373	0	3271
9	Chr11_9_UCR49_00001	Chr07	95.95	1481	46	11	6434	7905	59439132	59437657	0	2390
9	Chr11_9_UCR49_00001	Chr07	92.71	2043	80	32	7905	9921	59437693	59435694	0	2883
9	Chr11_9_UCR49_00001	Chr07	92.28	2966	149	38	10181	13105	59435337	59432411	0	4135
9	Chr11_9_UCR49_00001	Chr07	96.37	2091	56	13	13082	15162	59432377	59430297	0	3422
10	Chr11_10_CM140_NAU1232_00004	Chr07	94.4	4822	147	45	36344	41086	58098233	58103010	0	7295
10	Chr11_10_CM140_NAU1232_00004	Chr07	92.25	3885	234	35	32456	36303	58094380	58098234	0	5445
10	Chr11_10_CM140_NAU1232_00004	Chr07	93.22	767	35	5	31675	32426	58093617	58094381	0	1112
10	Chr11_10_CM140_NAU1232_00004	Chr07	95.43	657	30	0	31002	31658	58091705	58092361	0	1048
10	Chr11_10_CM140_NAU1232_00004	Chr07	93.38	1557	84	11	29012	30555	58090160	58091710	0	2287
10	Chr11_10_CM140_NAU1232_00004	Chr07	92.12	1485	114	3	27387	28869	58088372	58089855	0	2091
10	Chr11_10_CM140_NAU1232_00004	Chr07	95.69	7046	194	42	20346	27362	58081410	58088374	0	11226
10	Chr11_10_CM140_NAU1232_00004	Chr07	96.16	1042	24	1	19305	20346	58080341	58081366	0	1688
10	Chr11_10_CM140_NAU1232_00004	Chr07	95.76	1605	46	8	17679	19268	58078746	58080343	0	2567
10	Chr11_10_CM140_NAU1232_00004	Chr07	91.38	2587	130	33	14222	16744	58075666	58078223	0	3456
10	Chr11_10_CM140_NAU1232_00004	Chr07	90	650	41	14	11893	12539	58073494	58074122	0	819
10	Chr11_10_CM140_NAU1232_00004	Chr07	94.15	1470	64	8	5570	7036	58067521	58068971	0	2218
10	Chr11_10_CM140_NAU1232_00004	Chr07	92.88	1278	70	10	4298	5558	58066298	58067571	0	1836
10	Chr11_10_CM140_NAU1232_00004	Chr07	90.05	1497	103	12	1235	2715	58060957	58062423	0	1897
10	Chr11_10_CM140_NAU1232_00002	Chr07	91.93	1623	95	17	591	2207	58053997	58055589	0	2239
11	Chr11_11_NAU2152_00001	Chr07	91.14	1377	94	13	4534	5891	57330546	57331913	0	1842
11	Chr11_11_NAU2152_00001	Chr07	90.32	1560	86	28	1640	3142	57324356	57325907	0	1984
11	Chr11_11_NAU2152_00003	Chr07	91.6	988	52	14	33181	34162	57317934	57318896	0	1336
11	Chr11_11_NAU2152_00003	Chr07	92.55	3301	144	35	29772	33038	57313729	57316961	0	4639
11	Chr11_11_NAU2152_00003	Chr07	93.66	1152	52	13	26770	27914	57310693	57311830	0	1703
11	Chr11_11_NAU2152_00003	Chr07	95.42	743	32	2	23944	24685	57308235	57308976	0	1182
11	Chr11_11_NAU2152_00003	Chr07	97.58	1488	35	1	22405	23892	57306749	57308235	0	2547
11	Chr11_11_NAU2152_00003	Chr07	92.59	540	32	2	14203	14742	57298851	57299382	0	769
11	Chr11_11_NAU2152_00003	Chr07	95.47	1743	59	7	11911	13649	57297122	57298848	0	2763
11	Chr11_11_NAU2152_00003	Chr07	94.3	2018	78	15	9522	11526	57294999	57296992	0	3055
11	Chr11_11_NAU2152_00003	Chr07	90.58	764	66	5	8767	9526	57293561	57294322	0	1007
11	Chr11_11_NAU2152_00003	Chr07	93.17	1245	48	14	5881	7113	57290735	57291954	0	1794
11	Chr11_11_NAU2152_00003	Chr07	90.01	1891	131	25	2110	3957	57286918	57288793	0	2392
11	Chr11_11_NAU2152_00003	Chr07	92.96	2146	79	18	1	2118	57283773	57285874	0	3061
11	Chr11_11_NAU2152_00004	Chr07	95.86	2946	90	6	12813	15745	57278827	57281753	0	4735
11	Chr11_11_NAU2152_00004	Chr07	94.33	5323	249	22	6956	12235	57272836	57278148	0	8107
12	Chr11_12_BNL1231_00019	Chr07	90.38	2546	215	10	14003	16535	57249865	57252393	0	3317
12	Chr11_12_BNL1231_00015	Chr07	93.56	807	42	5	885	1682	57249557	57248752	0	1194
12	Chr11_12_BNL1231_00015	Chr07	94.07	2260	99	22	2692	4920	57246845	57244590	0	3398
12	Chr11_12_BNL1231_00015	Chr07	93.77	3866	193	26	4949	8773	57244590	57240732	0	5760
12	Chr11_12_BNL1231_00019	Chr07	95.29	871	40	1	27720	28590	57234910	57234041	0	1380
12	Chr11_12_BNL1231_00019	Chr07	93.79	1627	101	0	28590	30216	57234006	57232380	0	2446
12	Chr11_12_BNL1231_00019	Chr07	90.92	1201	79	13	30180	31358	57232380	57231188	0	1587
12	Chr11_12_BNL1231_00019	Chr07	90.48	1670	130	11	31478	33131	57231185	57229529	0	2176
12	Chr11_12_BNL1231_00001	Chr07	90.99	555	27	13	11307	11855	57206844	57206307	0	726
12	Chr11_12_BNL1231_00004	Chr07	95.52	513	13	7	24457	24967	57162957	57163461	0	811
12	Chr11_12_BNL1231_00005	Chr07	95.36	4526	205	5	1634	6158	57139763	57135242	0	7190
12	Chr11_12_BNL1231_00005	Chr07	94.41	644	36	0	695	1338	57134185	57134828	0	990
12	Chr11_12_BNL1231_00002	Chr07	90.26	544	44	5	4769	5312	57125194	57125728	0	702
12	Chr11_12_BNL1231_00008	Chr07	93.59	780	37	7	594	1373	57125117	57125883	0	1151
12	Chr11_12_BNL1231_00004	Chr07	92.29	1181	57	7	17	1197	57124939	57123793	0	1646
12	Chr11_12_BNL1231_00006	Chr07	90.96	1018	74	6	173	1187	57124795	57123793	0	1354
12	Chr11_12_BNL1231_00003	Chr07	91.28	539	44	3	771	1308	57122371	57121835	0	732
12	Chr11_12_BNL1231_00004	Chr07	92.92	537	38	0	2694	3230	57122371	57121835	0	782
12	Chr11_12_BNL1231_00003	Chr07	91.83	514	38	2	1307	1820	57119564	57119055	0	713
12	Chr11_12_BNL1231_00004	Chr07	95.5	511	22	1	3229	3739	57119564	57119055	0	815
12	Chr11_12_BNL1231_00002	Chr07	92.29	4788	328	25	1	4765	57117581	57112812	0	6759
12	Chr11_12_BNL1231_00004	Chr07	92.35	1019	45	8	4320	5307	57112811	57111795	0	1419
12	Chr11_12_BNL1231_00016	Chr07	91.66	2411	183	7	1716	4116	57109040	57106638	0	3323
12	Chr11_12_BNL1231_00004	Chr07	90.35	943	49	13	23518	24434	57100613	57099687	0	1199
12	Chr11_12_BNL1231_00003	Chr07	93.23	783	44	6	12722	13501	57081015	57080239	0	1144
12	Chr11_12_BNL1231_00003	Chr07	94.33	1993	73	15	14131	16113	57080241	57078279	0	3018
12	Chr11_12_BNL1231_00012	Chr07	93.97	1856	62	16	1	1843	57078286	57076468	0	2761
12	Chr11_12_BNL1231_00019	Chr07	91.71	1207	73	12	19685	20872	57047775	57046577	0	1650
12	Chr11_12_BNL1231_00004	Chr07	90.67	1179	56	10	8773	9950	57042291	57041166	0	1519
13	Chr11_13_Gh288_00002	Chr07	92.8	2432	112	25	3821	6222	56760526	56758128	0	3463
13	Chr11_13_Gh288_00002	Chr07	96.8	718	19	1	6418	7131	56758179	56757462	0	1195
13	Chr11_13_Gh288_00003	Chr07	95.45	946	38	4	1	945	56757468	56756527	0	1504
13	Chr11_13_Gh288_00003	Chr07	96.33	6893	183	25	944	7814	56756570	56749726	0	11263
13	Chr11_13_Gh288_00014	Chr07	90.59	2369	109	45	6	2338	56746951	56749241	0	3035
13	Chr11_13_Gh288_00004	Chr07	94.91	2359	77	20	121	2475	56746913	56744594	0	3651
13	Chr11_13_Gh288_00005	Chr07	96.56	1222	32	6	1	1217	56744601	56743385	0	2015
13	Chr11_13_Gh288_00006	Chr07	96.51	1661	54	3	3	1661	56743390	56741732	0	2743
13	Chr11_13_Gh288_00016	Chr07	91.74	1283	55	24	16	1282	56741716	56740469	0	1735
13	Chr11_13_Gh288_00007	Chr07	94.4	2893	103	20	3	2881	56735631	56732784	0	4390
13	Chr11_13_Gh288_00008	Chr07	97.09	1615	43	4	1	1612	56732791	56731178	0	2719
13	Chr11_13_Gh288_00008	Chr07	96.75	800	24	1	1578	2375	56731177	56730378	0	1332
13	Chr11_13_Gh288_00012	Chr07	94.81	2986	134	14	741	3715	56727414	56730389	0	4636
13	Chr11_13_Gh288_00012	Chr07	90.22	695	28	18	64	747	56726721	56727386	0	870
13	Chr11_13_Gh288_00011	Chr07	90.44	638	37	10	6482	7113	56725125	56725744	0	819
13	Chr11_13_Gh288_00011	Chr07	92.95	936	58	5	5955	6888	56720661	56721590	0	1356
13	Chr11_13_Gh288_00011	Chr07	93.38	1691	79	15	1	1661	56714845	56716532	0	2471
13	Chr11_13_Gh288_00015	Chr07	92.16	1811	84	22	704	2499	56711624	56713391	0	2505
14	Chr11_14_BNL3279_00001	Chr07	91.51	3099	247	11	2	3097	56193114	56190029	0	4252
14	Chr11_14_BNL3279_00005	Chr07	90.51	1296	106	14	964	2253	56192254	56193538	0	1696
14	Chr11_14_BNL3279_00003	Chr07	92.82	585	36	6	1580	2158	56191471	56190887	0	843
14	Chr11_14_BNL3279_00008	Chr07	90.48	2856	192	33	4994	7796	56177341	56174513	0	3694
14	Chr11_14_BNL3279_00008	Chr07	91.5	1682	110	19	5327	6993	56163751	56162088	0	2283
14	Chr11_14_BNL3279_00008	Chr07	90.98	820	49	23	6989	7796	56159664	56158858	0	1081
14	Chr11_14_BNL3279_00001	Chr07	90.24	1803	108	28	8574	10351	56147712	56145953	0	2303
14	Chr11_14_BNL3279_00001	Chr07	92.59	998	42	19	12835	13813	56144367	56143383	0	1404
14	Chr11_14_BNL3279_00001	Chr07	95.68	4306	143	27	13811	18096	56143110	56138828	0	6881
14	Chr11_14_BNL3279_00001	Chr07	91.04	748	59	2	24192	24931	56138836	56138089	0	1003
15	Chr11_15_CIR003_00012	Chr07	91.18	1893	89	22	15993	17823	55769461	55771337	0	2499
15	Chr11_15_CIR003_00012	Chr07	94.44	845	37	7	27839	28679	55738161	55738999	0	1291
15	Chr11_15_CIR003_00012	Chr07	90.49	536	39	5	8949	9475	55728046	55728578	0	697
15	Chr11_15_CIR003_00001	Chr07	94.92	1969	76	16	29764	31715	55707754	55705793	0	3061
15	Chr11_15_CIR003_00012	Chr07	92.79	1331	68	14	27356	28679	55704488	55705797	0	1901
15	Chr11_15_CIR003_00012	Chr07	90.86	755	62	3	12960	13707	55699845	55700599	0	1005
15	Chr11_15_CIR003_00012	Chr07	93.22	900	48	4	15993	16892	55680172	55681058	0	1312
15	Chr11_15_CIR003_00012	Chr07	94.77	1377	55	10	14624	15993	55678719	55680085	0	2128
15	Chr11_15_CIR003_00012	Chr07	92.78	637	41	4	89	725	55665342	55664711	0	917
15	Chr11_15_CIR003_00012	Chr07	94.71	1059	40	11	14624	15677	55602592	55603639	0	1631
15	Chr11_15_CIR003_00001	Chr07	95.62	1348	51	7	30220	31564	55594545	55593203	0	2156
15	Chr11_15_CIR003_00012	Chr07	90.16	3231	223	35	16567	19726	55567412	55570618	0	4117
15	Chr11_15_CIR003_00012	Chr07	94.36	1153	62	3	14851	16002	55565555	55566705	0	1766
15	Chr11_15_CIR003_00012	Chr07	93.76	689	37	3	11758	12442	55563062	55563748	0	1029
15	Chr11_15_CIR003_00012	Chr07	90.09	2199	155	23	16896	19048	55554528	55556709	0	2795
15	Chr11_15_CIR003_00012	Chr07	94.3	596	27	1	16259	16854	55553826	55554414	0	905
15	Chr11_15_CIR003_00001	Chr07	96.01	1954	75	3	29764	31715	55549397	55547445	0	3173
15	Chr11_15_CIR003_00012	Chr07	92.77	844	49	9	27839	28679	55546615	55547449	0	1210
15	Chr11_15_CIR003_00012	Chr07	91.69	2503	125	18	15993	18449	55541629	55544094	0	3393
16	Chr11_16_NAU6507_00016	Chr07	94.99	559	24	4	3443	4000	54438745	54439300	0	874
16	Chr11_16_NAU6507_00016	Chr07	91.93	2876	128	41	508	3318	54435681	54438517	0	3930
16	Chr11_16_NAU6507_00009	Chr07	93.25	1081	52	7	6793	7860	54433440	54434512	0	1572
16	Chr11_16_NAU6507_00009	Chr07	93.81	549	21	7	6182	6726	54432902	54433441	0	813
16	Chr11_16_NAU6507_00004	Chr07	94.86	1517	74	2	12509	14025	54421710	54423222	0	2366
16	Chr11_16_NAU6507_00004	Chr07	91.42	932	39	5	11328	12231	54416900	54417818	0	1240
16	Chr11_16_NAU6507_00004	Chr07	90.94	1468	98	13	4905	6361	54415461	54416904	0	1941
16	Chr11_16_NAU6507_00004	Chr07	90.29	721	63	6	2036	2754	54414586	54415301	0	937
16	Chr11_16_NAU6507_00002	Chr07	90.2	1572	112	29	730	2283	54410499	54412046	0	2012
16	Chr11_16_NAU6507_00001	Chr07	90.38	613	46	9	7326	7931	54408849	54409455	0	793
16	Chr11_16_NAU6507_00001	Chr07	92.83	697	46	2	6216	6911	54407991	54408684	0	1007
16	Chr11_16_NAU6507_00009	Chr07	92.67	1473	72	17	6182	7642	54378164	54379612	0	2089
16	Chr11_16_NAU6507_00009	Chr07	93.03	789	28	7	5108	5888	54377021	54377790	0	1127
17	Chr11_17_NAU5505_00001	Chr07	90.66	1156	73	12	6968	8093	52406395	52405245	0	1504
17	Chr11_17_NAU5505_00001	Chr07	91.14	971	78	7	9031	9996	52396960	52395993	0	1310
17	Chr11_17_NAU5505_00001	Chr07	90.25	1425	108	17	9009	10419	52382316	52380909	0	1832
17	Chr11_17_NAU5505_00005	Chr07	92.55	2538	128	24	69	2603	52380902	52378423	0	3583
17	Chr11_17_NAU5505_00005	Chr07	94.67	2928	120	17	9337	12250	52373507	52370602	0	4510
17	Chr11_17_NAU5505_00005	Chr07	92.54	1716	73	25	14113	15791	52368915	52367218	0	2409
17	Chr11_17_NAU5505_00005	Chr07	94.79	2843	66	26	15885	18661	52367174	52364348	0	4355
17	Chr11_17_NAU5505_00005	Chr07	91.72	918	52	7	20464	21359	52362508	52361593	0	1253
17	Chr11_17_NAU5505_00005	Chr07	94.32	4440	151	41	21471	25898	52361562	52357212	0	6709
17	Chr11_17_NAU5505_00005	Chr07	94.3	1824	60	13	37656	39462	52346051	52344255	0	2752
17	Chr11_17_NAU5505_00005	Chr07	97.5	2361	56	3	39461	41819	52344216	52341857	0	4030
17	Chr11_17_NAU5505_00005	Chr07	92.62	1368	42	16	41949	43297	52341829	52340502	0	1914
17	Chr11_17_NAU5505_00005	Chr07	94.64	6900	255	37	43601	50444	52340342	52333502	0	10586
17	Chr11_17_NAU5505_00005	Chr07	93.75	6050	214	69	56907	62854	52323753	52317766	0	8927
17	Chr11_17_NAU5505_00005	Chr07	91.15	633	38	5	69726	70356	52307404	52306788	0	843
17	Chr11_17_NAU5505_00005	Chr07	93.91	772	29	7	72888	73651	52304810	52304049	0	1149
18	Chr11_18_Gh300_00002	Chr07	91.34	808	43	16	13427	14209	51259917	51260722	0	1079
18	Chr11_18_Gh300_00002	Chr07	91.73	3749	244	25	4798	8494	51254951	51258685	0	5145
18	Chr11_18_Gh300_00002	Chr07	91.76	2827	218	11	1763	4586	51248048	51250862	0	3916
18	Chr11_18_Gh300_00002	Chr07	90.68	848	38	19	1	825	51246359	51247188	0	1090
18	Chr11_18_Gh300_00001	Chr07	95.96	5424	141	24	22463	27850	51238774	51244155	0	8732
18	Chr11_18_Gh300_00001	Chr07	90.35	1264	91	19	20793	22042	51236725	51237971	0	1629
18	Chr11_18_Gh300_00001	Chr07	91.92	1102	84	3	19697	20798	51235594	51236690	0	1537
18	Chr11_18_Gh300_00001	Chr07	94.62	3883	137	32	7456	11280	51220247	51224115	0	5947
18	Chr11_18_Gh300_00001	Chr07	90.91	594	46	8	5611	6201	51218387	51218975	0	791
18	Chr11_18_Gh300_00004	Chr07	90.37	1360	90	21	17922	19251	51215748	51217096	0	1748
18	Chr11_18_Gh300_00004	Chr07	93.36	6367	283	65	11741	18054	51209527	51215806	0	9286
18	Chr11_18_Gh300_00004	Chr07	94.71	1984	59	20	9450	11416	51207267	51209221	0	3040
18	Chr11_18_Gh300_00004	Chr07	90.61	703	35	5	1	672	51204664	51205366	0	904
18	Chr11_18_Gh300_00005	Chr07	91.31	4766	261	58	53	4733	51199972	51204669	0	6366
18	Chr11_18_Gh300_00004	Chr07	90.3	608	50	9	1259	1862	51013763	51013161	0	787
19	Chr11_19_NAU4962_00010	Chr07	95.38	4656	150	22	437	5067	50679962	50684577	0	7347
19	Chr11_19_NAU4962_00003	Chr07	93.73	861	36	8	1469	2315	50671366	50670510	0	1275
19	Chr11_19_NAU4962_00003	Chr07	95.43	634	26	2	7895	8527	50670273	50669642	0	1007
19	Chr11_19_NAU4962_00004	Chr07	94.32	792	38	1	23636	24420	50668493	50669284	0	1206
19	Chr11_19_NAU4962_00004	Chr07	93.43	594	31	6	22620	23209	50667681	50668270	0	874
19	Chr11_19_NAU4962_00004	Chr07	90.7	892	70	10	19583	20465	50666732	50667619	0	1175
19	Chr11_19_NAU4962_00004	Chr07	96.81	2543	53	13	16847	19368	50663845	50666380	0	4222
19	Chr11_19_NAU4962_00011	Chr07	97.08	959	25	2	59	1014	50660635	50659677	0	1613
19	Chr11_19_NAU4962_00004	Chr07	94.16	1438	38	5	3268	4676	50660631	50662051	0	2148
19	Chr11_19_NAU4962_00011	Chr07	97.53	1457	36	0	959	2415	50659684	50658228	0	2492
19	Chr11_19_NAU4962_00011	Chr07	97.37	1445	34	2	2464	3905	50658220	50656777	0	2455
19	Chr11_19_NAU4962_00011	Chr07	94.81	4220	114	30	3965	8102	50656783	50652587	0	6482
19	Chr11_19_NAU4962_00011	Chr07	95.94	3822	118	17	8200	12013	50652542	50648750	0	6165
19	Chr11_19_NAU4962_00011	Chr07	91.81	4482	296	32	18804	23245	50648206	50643756	0	6178
19	Chr11_19_NAU4962_00011	Chr07	97.85	2703	48	5	23252	25948	50643300	50640602	0	4662
20	Chr11_20_NAU3115_00001	Chr07	92.34	692	41	5	65183	65871	49475934	49476616	0	974
20	Chr11_20_NAU3115_00001	Chr07	97.63	3675	69	8	59419	63079	49470256	49473926	0	6288
20	Chr11_20_NAU3115_00001	Chr07	95.5	844	30	3	58458	59301	49469422	49470257	0	1341
20	Chr11_20_NAU3115_00001	Chr07	96.2	2264	81	2	56195	58458	49467125	49469383	0	3699
20	Chr11_20_NAU3115_00001	Chr07	93.08	3094	143	33	48056	51102	49464061	49467130	0	4462
20	Chr11_20_NAU3115_00001	Chr07	90.13	2149	123	30	43921	46010	49460117	49462235	0	2712
20	Chr11_20_NAU3115_00001	Chr07	96.26	5025	140	32	38819	43830	49452121	49457110	0	8194
20	Chr11_20_NAU3115_00001	Chr07	94.59	11038	318	116	27948	38825	49441060	49451978	0	16818
20	Chr11_20_NAU3115_00001	Chr07	92.14	4197	168	75	11802	15969	49429454	49433517	0	5773
20	Chr11_20_NAU3115_00001	Chr07	90.58	690	41	18	10787	11457	49428351	49429035	0	893
20	Chr11_20_NAU3115_00001	Chr07	96.11	2265	68	8	1990	4244	49419831	49422085	0	3677
20	Chr11_20_NAU3115_00001	Chr07	96.47	1928	56	5	72	1993	49417869	49419790	0	3173
21	Chr11_21_DPL0325_00001	Chr07	90.03	712	32	6	2024	2725	47311391	47312073	0	885
21	Chr11_21_DPL0325_00001	Chr07	90.59	1084	47	22	898	1954	47310335	47311390	0	1386
21	Chr11_21_DPL0325_00001	Chr07	96.72	670	14	5	8	671	47309487	47310154	0	1109
21	Chr11_21_DPL0325_00002	Chr07	94.73	1918	80	14	44680	46585	47307605	47309513	0	2963
21	Chr11_21_DPL0325_00002	Chr07	90.23	727	45	8	19125	19843	47278245	47278953	0	926
21	Chr11_21_DPL0325_00002	Chr07	92.68	956	35	16	18176	19114	47277201	47278138	0	1345
21	Chr11_21_DPL0325_00002	Chr07	96.65	9454	221	27	8673	18099	47267868	47277252	0	15616
21	Chr11_21_DPL0325_00002	Chr07	92.5	720	24	9	4550	5265	47264617	47265310	0	1003
21	Chr11_20_NAU3115_00001	Chr07	90.02	1943	163	19	23405	25336	46997606	46995684	0	2484
21	Chr11_20_NAU3115_00001	Chr07	93.82	680	33	4	25716	26387	46995372	46994694	0	1014
22	Chr11_22_BNL1408_00004	Chr07	94.29	910	27	7	1766	2653	43875041	43875947	0	1369
22	Chr11_22_BNL1408_00004	Chr07	93.68	838	31	9	421	1240	43873841	43874674	0	1234
22	Chr11_22_BNL1408_00003	Chr07	92.85	4307	159	53	11	4215	43869224	43873483	0	6109
22	Chr11_22_BNL1408_00002	Chr07	92.15	688	31	8	1984	2670	43866869	43867534	0	950
22	Chr11_22_BNL1408_00001	Chr07	91.17	1098	93	4	8442	9537	43865296	43866391	0	1487
22	Chr11_22_BNL1408_00001	Chr07	90.46	744	67	2	4577	5319	43864169	43864909	0	977
22	Chr11_22_BNL1408_00001	Chr07	93.38	665	37	6	2057	2718	43854945	43855605	0	977
23	Chr11_23_BNL3592_00001	Chr07	93.38	665	37	6	65434	66095	43854945	43855605	0	977
23	Chr11_23_BNL3592_00001	Chr07	93.69	586	35	2	58072	58657	43850685	43851268	0	876
23	Chr11_23_BNL3592_00001	Chr07	90.33	889	71	4	44893	45781	43820769	43821642	0	1151
23	Chr11_23_BNL3592_00001	Chr07	92.56	618	42	4	25864	26479	43817397	43818012	0	883
23	Chr11_23_BNL3592_00001	Chr07	92.2	2731	105	36	1037	3732	43797843	43800500	0	3766
23	Chr11_23_BNL3592_00001	Chr07	94.3	754	37	4	223	973	43797093	43797843	0	1149
			93.1929	615953	27896	4718			17113099

## Sheet: Table S32 AD2-chr11
Table S32 The alignment of Chr11 BACs to Gossypium barbadense (AD2) (https://www.cottongen.org/species/Gossypium_barbadense/nbi-AD2_genome_v1.0).
# BAC	Query id (BAC name + Congtig number)	Subject id (G. hirsutum mRNA Unigenes)	identity %	alignment length	mismatches	gap openings	q.start	q.end	s.start	s.end	e-value	hit
1	Chr11_1_BNL2650_00003	gnl|AD2_NBI|At11	99.76	423	1	0	13581	14003	96770036	96769614	0	776
1	Chr11_1_BNL2650_00002	gnl|AD2_NBI|At11	99.62	1060	4	0	1400	2459	96769619	96768560	0	1936
1	Chr11_1_BNL2650_00002	gnl|AD2_NBI|At11	99.61	4826	14	1	2456	7276	96768513	96763688	0	8802
1	Chr11_1_BNL2650_00002	gnl|AD2_NBI|At11	99.44	7289	31	3	7276	14555	96760745	96753458	0	13224
1	Chr11_1_BNL2650_00002	gnl|AD2_NBI|At11	99.69	4227	5	4	13633	17856	96753458	96749237	0	7727
1	Chr11_1_BNL2650_00002	gnl|AD2_NBI|At11	99.43	529	3	0	17553	18081	96749236	96748708	0	961
1	Chr11_1_BNL2650_00002	gnl|AD2_NBI|At11	99.05	1267	6	4	18164	19425	96748713	96747448	0	2268
1	Chr11_1_BNL2650_00002	gnl|AD2_NBI|At11	98.62	795	6	3	19124	19915	96743835	96743043	0	1402
1	Chr11_1_BNL2650_00002	gnl|AD2_NBI|At11	99.16	9092	53	14	19912	28986	96743107	96734022	0	16347
13	Chr11_13_Gh288_00010	gnl|AD2_NBI|At11	99.18	243	2	0	26	268	96399511	96399269	1e-119	438
13	Chr11_13_Gh288_00010	gnl|AD2_NBI|At11	96.19	315	10	2	235	549	96399267	96398955	2e-142	514
13	Chr11_13_Gh288_00010	gnl|AD2_NBI|At11	97.83	92	2	0	633	724	96398958	96398867	9e-36	159
13	Chr11_13_Gh288_00010	gnl|AD2_NBI|At11	96.25	587	21	1	806	1391	96398790	96398204	0	961
13	Chr11_13_Gh288_00010	gnl|AD2_NBI|At11	98.1	158	3	0	1486	1643	96398160	96398003	9e-71	276
13	Chr11_13_Gh288_00010	gnl|AD2_NBI|At11	95.06	526	23	3	1684	2206	96398008	96397483	0	824
13	Chr11_13_Gh288_00010	gnl|AD2_NBI|At11	95.98	2414	95	2	2472	4883	96396939	96394526	0	3919
13	Chr11_13_Gh288_00010	gnl|AD2_NBI|At11	96.6	618	21	0	4507	5124	96390240	96389623	0	1026
13	Chr11_13_Gh288_00010	gnl|AD2_NBI|At11	97.27	1097	29	1	5162	6258	96388967	96387872	0	1858
13	Chr11_13_Gh288_00020	gnl|AD2_NBI|At11	93.17	205	13	1	1	205	96388713	96388916	1e-79	300
13	Chr11_13_Gh288_00019	gnl|AD2_NBI|At11	95.33	150	7	0	1	150	96388244	96388393	2e-61	239
13	Chr11_13_Gh288_00010	gnl|AD2_NBI|At11	97.5	520	13	0	6065	6584	96387876	96387357	0	889
13	Chr11_13_Gh288_00017	gnl|AD2_NBI|At11	96.82	472	15	0	1	472	96387042	96387513	0	789
13	Chr11_13_Gh288_00009	gnl|AD2_NBI|At11	97.45	392	9	1	5390	5780	96386337	96386728	0	667
7	Chr11_7_MUSB1076_00046	gnl|AD2_NBI|At11	94.17	755	30	8	1218	1961	96279872	96280623	0	1138
7	Chr11_7_MUSB1076_00046	gnl|AD2_NBI|At11	94.59	74	2	2	961	1032	96279660	96279733	3e-22	113
7	Chr11_7_MUSB1076_00035	gnl|AD2_NBI|At11	97.26	73	2	0	1	73	96279542	96279470	2e-26	124
7	Chr11_7_MUSB1076_00046	gnl|AD2_NBI|At11	94.15	188	9	2	652	839	96279474	96279659	6e-74	285
7	Chr11_7_MUSB1076_00005	gnl|AD2_NBI|At11	98.83	1448	17	0	1366	2813	96244644	96243197	0	2580
7	Chr11_7_MUSB1076_00005	gnl|AD2_NBI|At11	98.09	6805	36	31	3241	10022	96242152	96235419	0	11760
7	Chr11_7_MUSB1076_00005	gnl|AD2_NBI|At11	98.09	6805	36	31	3241	10022	96242152	96235419	0	11760
7	Chr11_7_MUSB1076_00021	gnl|AD2_NBI|At11	94.74	95	5	0	10171	10265	96240843	96240937	4e-32	148
7	Chr11_7_MUSB1076_00024	gnl|AD2_NBI|At11	93.75	96	6	0	2734	2829	96240842	96240937	1e-31	145
7	Chr11_7_MUSB1076_00036	gnl|AD2_NBI|At11	93.75	96	6	0	1213	1308	96240842	96240937	6e-32	145
7	Chr11_7_MUSB1076_00021	gnl|AD2_NBI|At11	95.75	353	12	3	7723	8072	96239487	96239839	9e-158	566
7	Chr11_7_MUSB1076_00005	gnl|AD2_NBI|At11	97	100	3	0	10300	10399	96234983	96234884	2e-38	169
7	Chr11_7_MUSB1076_00053	gnl|AD2_NBI|At11	98.79	1401	8	3	1	1397	96234756	96233361	0	2484
7	Chr11_7_MUSB1076_00011	gnl|AD2_NBI|At11	91.5	247	21	0	8432	8678	96233757	96233511	4e-90	340
7	Chr11_7_MUSB1076_00062	gnl|AD2_NBI|At11	94.31	246	14	0	1	246	96233756	96233511	8e-103	377
7	Chr11_7_MUSB1076_00002	gnl|AD2_NBI|At11	94.67	525	25	1	6125	6646	96233746	96233222	0	811
7	Chr11_7_MUSB1076_00064	gnl|AD2_NBI|At11	90.45	199	18	1	1312	1510	96233599	96233796	6e-67	261
7	Chr11_7_MUSB1076_00052	gnl|AD2_NBI|At11	96.71	152	5	0	2863	3014	96233514	96233363	2e-64	254
7	Chr11_7_MUSB1076_00050	gnl|AD2_NBI|At11	92.97	441	27	4	160	599	96233409	96233846	0	640
7	Chr11_7_MUSB1076_00040	gnl|AD2_NBI|At11	94.94	178	9	0	1	178	96233345	96233168	2e-73	279
7	Chr11_7_MUSB1076_00053	gnl|AD2_NBI|At11	99.39	816	5	0	1511	2326	96233265	96232450	0	1480
7	Chr11_7_MUSB1076_00029	gnl|AD2_NBI|At11	94.79	288	15	0	586	873	96233228	96232941	6e-124	449
7	Chr11_7_MUSB1076_00016	gnl|AD2_NBI|At11	97.3	371	10	0	1	371	96233185	96232815	9e-179	630
7	Chr11_7_MUSB1076_00049	gnl|AD2_NBI|At11	96	125	5	0	1	125	96233185	96233061	6e-51	204
7	Chr11_7_MUSB1076_00006	gnl|AD2_NBI|At11	91.13	1612	125	17	1	1603	96232993	96231391	0	2169
7	Chr11_7_MUSB1076_00059	gnl|AD2_NBI|At11	95.06	162	6	2	1	161	96232710	96232870	9e-66	254
7	Chr11_7_MUSB1076_00015	gnl|AD2_NBI|At11	91.58	285	12	4	137	409	96232543	96232259	3e-104	383
7	Chr11_7_MUSB1076_00043	gnl|AD2_NBI|At11	96.69	332	11	0	63	394	96232539	96232870	2e-155	553
7	Chr11_7_MUSB1076_00014	gnl|AD2_NBI|At11	97.59	83	1	1	125	207	96232520	96232439	1e-31	141
7	Chr11_7_MUSB1076_00030	gnl|AD2_NBI|At11	96.22	344	13	0	1	344	96232450	96232793	8e-159	564
7	Chr11_7_MUSB1076_00054	gnl|AD2_NBI|At11	91.37	371	18	10	1	357	96232434	96232064	3e-138	496
7	Chr11_7_MUSB1076_00044	gnl|AD2_NBI|At11	99.02	205	2	0	1	205	96232116	96232320	4e-100	368
7	Chr11_7_MUSB1076_00042	gnl|AD2_NBI|At11	92.93	297	21	0	1	297	96232078	96231782	2e-119	433
7	Chr11_7_MUSB1076_00010	gnl|AD2_NBI|At11	90.82	414	34	2	3	413	96231992	96231580	8e-155	551
7	Chr11_7_MUSB1076_00063	gnl|AD2_NBI|At11	92.97	185	6	5	1	185	96231524	96231347	2e-68	263
7	Chr11_7_MUSB1076_00009	gnl|AD2_NBI|At11	91.37	452	27	6	1	452	96231268	96231707	5e-172	608
7	Chr11_7_MUSB1076_00032	gnl|AD2_NBI|At11	90.74	270	25	0	8	277	96231060	96231329	9e-98	361
7	Chr11_7_MUSB1076_00034	gnl|AD2_NBI|At11	92.64	258	19	0	1	258	96230617	96230360	3e-100	372
7	Chr11_7_MUSB1076_00060	gnl|AD2_NBI|At11	91.33	323	28	0	16880	17202	96230361	96230683	4e-120	442
7	Chr11_7_MUSB1076_00007	gnl|AD2_NBI|At11	99.83	1753	3	0	1222	2974	96230360	96232112	0	3221
7	Chr11_7_MUSB1076_00004	gnl|AD2_NBI|At11	98.55	483	7	0	2422	2904	96230359	96229877	0	854
10	Chr11_10_CM140_NAU1232_00001	gnl|AD2_NBI|At11	99.16	2975	23	2	299	3272	96229468	96226495	0	5354
7	Chr11_7_MUSB1076_00002	gnl|AD2_NBI|At11	99.3	4594	30	2	2054	6646	96213331	96208739	0	8305
16	Chr11_16_NAU6507_00019	gnl|AD2_NBI|At11	97.62	1050	23	2	1	1048	96207663	96206614	0	1799
16	Chr11_16_NAU6507_00014	gnl|AD2_NBI|At11	99.57	230	1	0	1	230	96207289	96207518	1e-115	420
16	Chr11_16_NAU6507_00008	gnl|AD2_NBI|At11	100	175	0	0	1	175	96206806	96206980	7e-87	324
16	Chr11_16_NAU6507_00015	gnl|AD2_NBI|At11	98.47	1049	13	2	1	1048	96206473	96207519	0	1845
16	Chr11_16_NAU6507_00020	gnl|AD2_NBI|At11	96.82	1824	54	2	1	1823	96206462	96204642	0	3044
16	Chr11_16_NAU6507_00013	gnl|AD2_NBI|At11	97.36	643	17	0	1	643	96205479	96206121	0	1094
16	Chr11_16_NAU6507_00006	gnl|AD2_NBI|At11	98.15	162	3	0	1	162	96205133	96205294	1e-74	283
16	Chr11_16_NAU6507_00012	gnl|AD2_NBI|At11	99.38	162	1	0	1	162	96205133	96205294	5e-78	294
16	Chr11_16_NAU6507_00011	gnl|AD2_NBI|At11	98.66	374	5	0	1	374	96204733	96205106	0	664
16	Chr11_16_NAU6507_00021	gnl|AD2_NBI|At11	97.24	181	5	0	1	181	96203803	96203983	7e-82	307
16	Chr11_16_NAU6507_00010	gnl|AD2_NBI|At11	97.34	188	5	0	1	188	96203430	96203243	9e-85	320
16	Chr11_16_NAU6507_00022	gnl|AD2_NBI|At11	90.99	455	32	7	1	454	96203430	96202984	7e-171	604
16	Chr11_16_NAU6507_00010	gnl|AD2_NBI|At11	99.05	1266	12	0	182	1447	96203421	96204686	0	2272
16	Chr11_16_NAU6507_00018	gnl|AD2_NBI|At11	98.31	177	2	1	1164	1340	96203174	96202999	2e-81	309
16	Chr11_16_NAU6507_00005	gnl|AD2_NBI|At11	99.49	198	1	0	1	198	96202882	96202685	3e-97	361
16	Chr11_16_NAU6507_00023	gnl|AD2_NBI|At11	97.33	187	5	0	1	187	96202859	96203045	4e-85	318
7	Chr11_7_MUSB1076_00060	gnl|AD2_NBI|At11	92.29	2100	114	13	6524	8607	96200618	96202685	0	2937
7	Chr11_7_MUSB1076_00060	gnl|AD2_NBI|At11	99.22	4630	25	7	23886	28505	96198148	96202776	0	8340
7	Chr11_7_MUSB1076_00060	gnl|AD2_NBI|At11	90.46	1699	128	10	1755	3453	96190859	96192523	0	2209
7	Chr11_7_MUSB1076_00060	gnl|AD2_NBI|At11	99.72	2472	4	2	19014	21483	96190301	96192771	0	4523
7	Chr11_7_MUSB1076_00060	gnl|AD2_NBI|At11	99.66	4139	10	2	12588	16726	96184548	96188682	0	7563
7	Chr11_7_MUSB1076_00060	gnl|AD2_NBI|At11	98.56	5626	16	7	7010	12592	96170258	96175861	0	9880
7	Chr11_7_MUSB1076_00060	gnl|AD2_NBI|At11	98.56	5626	16	7	7010	12592	96170258	96175861	0	9880
7	Chr11_7_MUSB1076_00060	gnl|AD2_NBI|At11	99.07	4208	22	8	2859	7060	96166066	96170262	0	7539
7	Chr11_7_MUSB1076_00060	gnl|AD2_NBI|At11	91.78	1631	110	1	19014	20620	96164436	96166066	0	2248
12	Chr11_12_BNL1231_00002	gnl|AD2_NBI|At11	95.88	170	7	0	793	962	96127319	96127150	1e-70	276
12	Chr11_12_BNL1231_00002	gnl|AD2_NBI|At11	97.48	2266	54	3	2502	4765	96125682	96123418	0	3866
12	Chr11_12_BNL1231_00002	gnl|AD2_NBI|At11	97.44	78	1	1	1	77	96123494	96123417	2e-27	132
12	Chr11_12_BNL1231_00005	gnl|AD2_NBI|At11	96.88	96	2	1	1543	1638	96113015	96113109	9e-36	159
12	Chr11_12_BNL1231_00005	gnl|AD2_NBI|At11	95.74	493	20	1	1630	2121	96112188	96111696	0	793
16	Chr11_16_NAU6507_00023	gnl|AD2_NBI|At11	97.33	187	5	0	1	187	95407256	95407070	4e-85	318
16	Chr11_16_NAU6507_00010	gnl|AD2_NBI|At11	98.89	1266	14	0	182	1447	95406694	95405429	0	2261
16	Chr11_16_NAU6507_00010	gnl|AD2_NBI|At11	98.4	188	3	0	1	188	95406685	95406872	4e-88	331
16	Chr11_16_NAU6507_00022	gnl|AD2_NBI|At11	91.43	455	30	7	1	454	95406685	95407131	3e-174	616
16	Chr11_16_NAU6507_00021	gnl|AD2_NBI|At11	97.24	181	5	0	1	181	95406312	95406132	7e-82	307
16	Chr11_16_NAU6507_00011	gnl|AD2_NBI|At11	98.93	374	4	0	1	374	95404917	95404544	0	669
16	Chr11_16_NAU6507_00006	gnl|AD2_NBI|At11	98.15	162	3	0	1	162	95404517	95404356	1e-74	283
16	Chr11_16_NAU6507_00012	gnl|AD2_NBI|At11	99.38	162	1	0	1	162	95404517	95404356	5e-78	294
16	Chr11_16_NAU6507_00013	gnl|AD2_NBI|At11	98.13	643	12	0	1	643	95404171	95403529	0	1122
16	Chr11_16_NAU6507_00020	gnl|AD2_NBI|At11	96.98	1824	51	2	1	1823	95403188	95405008	0	3061
16	Chr11_16_NAU6507_00015	gnl|AD2_NBI|At11	98.57	1049	12	2	1	1048	95403177	95402131	0	1851
16	Chr11_16_NAU6507_00008	gnl|AD2_NBI|At11	100	175	0	0	1	175	95402844	95402670	7e-87	324
16	Chr11_16_NAU6507_00014	gnl|AD2_NBI|At11	99.13	230	2	0	1	230	95402361	95402132	6e-114	414
16	Chr11_16_NAU6507_00005	gnl|AD2_NBI|At11	99.49	196	1	0	1	196	95401987	95402182	4e-96	357
16	Chr11_16_NAU6507_00019	gnl|AD2_NBI|At11	97.62	1050	23	2	1	1048	95401987	95403036	0	1799
16	Chr11_16_NAU6507_00018	gnl|AD2_NBI|At11	97.29	258	6	1	1083	1340	95401614	95401870	8e-120	436
14	Chr11_14_BNL3279_00010	gnl|AD2_NBI|At11	95.74	564	24	0	1959	2522	95226832	95226269	0	909
14	Chr11_14_BNL3279_00010	gnl|AD2_NBI|At11	91.54	1135	82	7	2621	3752	95226211	95225088	0	1552
14	Chr11_14_BNL3279_00008	gnl|AD2_NBI|At11	95.92	147	5	1	1256	1402	95221757	95221902	6e-59	237
14	Chr11_14_BNL3279_00007	gnl|AD2_NBI|At11	95.98	174	7	0	411	584	95221347	95221520	9e-74	283
14	Chr11_14_BNL3279_00008	gnl|AD2_NBI|At11	95.39	347	16	0	213	559	95221174	95221520	5e-154	553
14	Chr11_14_BNL3279_00009	gnl|AD2_NBI|At11	95	300	12	2	22	319	95220672	95220374	6e-130	468
14	Chr11_14_BNL3279_00013	gnl|AD2_NBI|At11	94.47	1048	43	7	22	1066	95220672	95219637	0	1600
14	Chr11_14_BNL3279_00010	gnl|AD2_NBI|At11	92.33	587	31	4	1	586	95220209	95219636	0	822
11	Chr11_11_NAU2152_00001	gnl|AD2_NBI|At11	98.42	5241	33	20	659	5892	93150508	93155705	0	9173
11	Chr11_11_NAU2152_00001	gnl|AD2_NBI|At11	96.96	592	11	4	39	626	93149925	93150513	0	987
11	Chr11_11_NAU2152_00002	gnl|AD2_NBI|At11	98.11	5305	64	10	1	5276	93144774	93150071	0	9210
11	Chr11_11_NAU2152_00003	gnl|AD2_NBI|At11	98.95	2197	18	4	35597	37788	93142331	93144527	0	3925
11	Chr11_11_NAU2152_00002	gnl|AD2_NBI|At11	97.72	351	8	0	1734	2084	93141985	93142335	8e-170	604
11	Chr11_11_NAU2152_00002	gnl|AD2_NBI|At11	97.29	1920	22	5	1	1892	93140067	93141984	0	3230
11	Chr11_11_NAU2152_00003	gnl|AD2_NBI|At11	98.05	12260	75	39	25618	37788	93127636	93139820	0	21165
11	Chr11_11_NAU2152_00003	gnl|AD2_NBI|At11	98.13	3216	48	9	24691	27904	93124144	93127349	0	5596
11	Chr11_11_NAU2152_00003	gnl|AD2_NBI|At11	99.47	2282	9	3	22405	24685	93121775	93124054	0	4145
11	Chr11_11_NAU2152_00003	gnl|AD2_NBI|At11	97.98	5394	42	23	16959	22331	93103093	93108440	0	9295
11	Chr11_11_NAU2152_00003	gnl|AD2_NBI|At11	97.69	3078	19	8	14863	17938	93100065	93103092	0	5243
11	Chr11_11_NAU2152_00003	gnl|AD2_NBI|At11	99.34	3658	8	12	11085	14741	93096419	93100061	0	6608
11	Chr11_11_NAU2152_00003	gnl|AD2_NBI|At11	99.26	3226	21	2	8390	11615	93090897	93094119	0	5821
11	Chr11_11_NAU2152_00003	gnl|AD2_NBI|At11	98.84	7648	29	18	1	7611	93082955	93090579	0	13575
11	Chr11_11_NAU2152_00004	gnl|AD2_NBI|At11	99.48	1921	10	0	15757	17677	93080925	93082845	0	3493
11	Chr11_11_NAU2152_00004	gnl|AD2_NBI|At11	99.67	4873	16	0	10874	15746	93076102	93080974	0	8911
11	Chr11_11_NAU2152_00004	gnl|AD2_NBI|At11	98.55	4285	37	8	7676	11939	93070847	93075127	0	7546
11	Chr11_11_NAU2152_00004	gnl|AD2_NBI|At11	99.29	5096	28	4	3713	8803	93065758	93070850	0	9204
11	Chr11_11_NAU2152_00004	gnl|AD2_NBI|At11	99.02	713	6	1	3007	3719	93060411	93061122	0	1277
11	Chr11_11_NAU2152_00004	gnl|AD2_NBI|At11	98.41	3011	36	4	5	3011	93047879	93050881	0	5284
16	Chr11_16_NAU6507_00001	gnl|AD2_NBI|At11	98.82	5856	52	6	1	5856	91202707	91208545	0	10416
17	Chr11_17_NAU5505_00001	gnl|AD2_NBI|At11	98.69	2669	14	7	5	2669	88299821	88297170	0	4715
17	Chr11_17_NAU5505_00001	gnl|AD2_NBI|At11	98.51	8999	51	30	1438	10422	88297169	88288240	0	15799
17	Chr11_17_NAU5505_00005	gnl|AD2_NBI|At11	94.44	54	3	0	10054	10107	88291723	88291670	7e-12	84.2
17	Chr11_17_NAU5505_00005	gnl|AD2_NBI|At11	98.9	7353	44	9	61	7404	88288244	88280920	0	13095
17	Chr11_17_NAU5505_00005	gnl|AD2_NBI|At11	95.97	1885	20	10	7409	9259	88280498	88278636	0	3011
17	Chr11_17_NAU5505_00005	gnl|AD2_NBI|At11	98.92	7600	49	12	8246	15838	88278628	88271055	0	13557
17	Chr11_17_NAU5505_00005	gnl|AD2_NBI|At11	99.85	1323	2	0	15885	17207	88265906	88264584	0	2433
17	Chr11_17_NAU5505_00005	gnl|AD2_NBI|At11	99.03	18859	121	22	17435	36263	88260501	88241674	0	33761
17	Chr11_17_NAU5505_00005	gnl|AD2_NBI|At11	98.38	1357	13	5	36324	37672	88241670	88240315	0	2375
17	Chr11_17_NAU5505_00005	gnl|AD2_NBI|At11	98.66	5652	44	5	37660	43297	88240274	88234641	0	9989
17	Chr11_17_NAU5505_00005	gnl|AD2_NBI|At11	99.16	9004	29	5	41540	50538	88226135	88217174	0	16164
17	Chr11_17_NAU5505_00005	gnl|AD2_NBI|At11	97.58	2476	13	6	49065	51537	88217173	88214742	0	4196
17	Chr11_17_NAU5505_00005	gnl|AD2_NBI|At11	100	189	0	0	51610	51798	88214792	88214604	6e-92	350
17	Chr11_17_NAU5505_00005	gnl|AD2_NBI|At11	100	53	0	0	51809	51861	88214656	88214604	2e-16	99
17	Chr11_17_NAU5505_00005	gnl|AD2_NBI|At11	99.2	11125	58	12	51872	62968	88214655	88203534	0	20022
17	Chr11_17_NAU5505_00005	gnl|AD2_NBI|At11	98.58	10746	66	23	62962	73653	88203662	88192950	0	18916
18	Chr11_18_Gh300_00002	gnl|AD2_NBI|At11	98.92	3069	16	13	11950	15012	87097815	87100872	0	5469
18	Chr11_18_Gh300_00004	gnl|AD2_NBI|At11	96.61	177	5	1	4357	4532	87096954	87096778	3e-75	292
18	Chr11_18_Gh300_00002	gnl|AD2_NBI|At11	99	802	7	1	9495	10296	87095025	87095825	0	1435
18	Chr11_18_Gh300_00002	gnl|AD2_NBI|At11	99.37	5588	32	3	3125	8711	87088619	87094204	0	10122
18	Chr11_18_Gh300_00002	gnl|AD2_NBI|At11	99.21	4529	27	6	2	4524	87083965	87088490	0	8155
18	Chr11_18_Gh300_00001	gnl|AD2_NBI|At11	99.31	9519	51	8	20318	29827	87074462	87083974	0	17198
18	Chr11_18_Gh300_00001	gnl|AD2_NBI|At11	98.99	7396	39	11	12986	20351	87067073	87074462	0	13210
18	Chr11_18_Gh300_00001	gnl|AD2_NBI|At11	99.81	1586	3	0	13001	14586	87065487	87067072	0	2913
18	Chr11_18_Gh300_00001	gnl|AD2_NBI|At11	99.5	1797	6	3	12268	14063	87063692	87065486	0	3265
18	Chr11_18_Gh300_00001	gnl|AD2_NBI|At11	98.48	3019	26	2	9080	12096	87060272	87063272	0	5302
18	Chr11_18_Gh300_00001	gnl|AD2_NBI|At11	98.66	3360	38	5	7927	11280	87056516	87059874	0	5949
18	Chr11_18_Gh300_00001	gnl|AD2_NBI|At11	97.68	8611	121	36	1	8567	87047306	87055881	0	14720
18	Chr11_18_Gh300_00003	gnl|AD2_NBI|At11	99.21	1387	10	1	1	1386	87045926	87047312	0	2499
18	Chr11_18_Gh300_00004	gnl|AD2_NBI|At11	99.2	9862	41	17	9441	19273	87036082	87045934	0	17740
18	Chr11_18_Gh300_00004	gnl|AD2_NBI|At11	98.92	2220	16	5	7151	9365	87033779	87035995	0	3960
18	Chr11_18_Gh300_00004	gnl|AD2_NBI|At11	98.98	293	3	0	6430	6722	87033188	87033480	2e-145	525
18	Chr11_18_Gh300_00004	gnl|AD2_NBI|At11	98.81	589	6	1	5481	6068	87032599	87033187	0	1048
18	Chr11_18_Gh300_00004	gnl|AD2_NBI|At11	97.58	165	4	0	5183	5347	87032285	87032449	2e-72	283
18	Chr11_18_Gh300_00004	gnl|AD2_NBI|At11	92.62	122	9	0	3836	3957	87031075	87031196	3e-40	176
18	Chr11_18_Gh300_00004	gnl|AD2_NBI|At11	96.74	767	9	2	3022	3772	87030383	87031149	0	1264
18	Chr11_18_Gh300_00004	gnl|AD2_NBI|At11	99.09	330	2	1	2882	3210	87030054	87030383	2e-165	592
18	Chr11_18_Gh300_00004	gnl|AD2_NBI|At11	97.15	1123	12	3	1614	2736	87028882	87029984	0	1879
18	Chr11_18_Gh300_00004	gnl|AD2_NBI|At11	97.4	231	6	0	1192	1422	87028500	87028730	7e-106	394
18	Chr11_18_Gh300_00004	gnl|AD2_NBI|At11	99.42	866	5	0	1	866	87027238	87028103	0	1572
18	Chr11_18_Gh300_00005	gnl|AD2_NBI|At11	99.18	4169	20	7	573	4733	87023080	87027242	0	7498
18	Chr11_18_Gh300_00005	gnl|AD2_NBI|At11	91.91	3077	136	34	5	3009	87020044	87023079	0	4198
19	Chr11_19_NAU4962_00003	gnl|AD2_NBI|At11	99.53	2126	7	2	538	2660	86082188	86080063	0	3868
19	Chr11_19_NAU4962_00010	gnl|AD2_NBI|At11	99.18	5015	18	6	58	5067	86082184	86087180	0	9012
19	Chr11_19_NAU4962_00003	gnl|AD2_NBI|At11	97.88	566	9	3	2929	3492	86079829	86079265	0	976
19	Chr11_19_NAU4962_00003	gnl|AD2_NBI|At11	98.78	4500	50	3	3480	7975	86079074	86074576	0	8000
19	Chr11_19_NAU4962_00003	gnl|AD2_NBI|At11	98.86	1582	17	1	6949	8529	86074575	86072994	0	2820
19	Chr11_19_NAU4962_00004	gnl|AD2_NBI|At11	99	1493	14	1	23226	24718	86071511	86073002	0	2673
19	Chr11_19_NAU4962_00004	gnl|AD2_NBI|At11	99.22	2303	18	0	21043	23345	86068056	86070358	0	4154
19	Chr11_19_NAU4962_00004	gnl|AD2_NBI|At11	99.38	6333	33	5	16105	22436	86059927	86066254	0	11474
19	Chr11_19_NAU4962_00004	gnl|AD2_NBI|At11	99.12	2395	17	3	13606	15997	86057488	86059881	0	4303
19	Chr11_19_NAU4962_00004	gnl|AD2_NBI|At11	98.99	5830	54	5	7690	13516	86051663	86057490	0	10434
19	Chr11_19_NAU4962_00004	gnl|AD2_NBI|At11	99.22	5135	35	4	4413	9543	86044628	86049761	0	9256
19	Chr11_19_NAU4962_00004	gnl|AD2_NBI|At11	99.67	2430	6	1	3268	5695	86037819	86040248	0	4442
19	Chr11_19_NAU4962_00011	gnl|AD2_NBI|At11	99.56	8351	24	3	59	8407	86034659	86026320	0	15204
19	Chr11_19_NAU4962_00011	gnl|AD2_NBI|At11	99.19	4175	16	3	7829	11985	86026326	86022152	0	7505
19	Chr11_19_NAU4962_00011	gnl|AD2_NBI|At11	99.18	3665	23	6	10550	14210	86019255	86015594	0	6595
20	Chr11_20_NAU3115_00001	gnl|AD2_NBI|At11	99.08	2278	8	8	63600	65871	84763474	84765744	0	4078
20	Chr11_20_NAU3115_00005	gnl|AD2_NBI|At11	99.35	155	0	1	1	154	84763192	84763038	1e-73	279
20	Chr11_20_NAU3115_00001	gnl|AD2_NBI|At11	99.55	446	2	0	63144	63589	84763078	84763523	0	813
20	Chr11_20_NAU3115_00001	gnl|AD2_NBI|At11	99.94	3177	2	0	59903	63079	84759861	84763037	0	5856
20	Chr11_20_NAU3115_00001	gnl|AD2_NBI|At11	99.7	4598	13	1	56354	60951	84755264	84759860	0	8412
20	Chr11_20_NAU3115_00001	gnl|AD2_NBI|At11	99.59	1225	5	0	55833	57057	84751400	84752624	0	2235
20	Chr11_20_NAU3115_00001	gnl|AD2_NBI|At11	99.29	701	5	0	54344	55044	84749793	84750493	0	1267
20	Chr11_20_NAU3115_00001	gnl|AD2_NBI|At11	99.72	717	2	0	52721	53437	84748093	84748809	0	1314
20	Chr11_20_NAU3115_00001	gnl|AD2_NBI|At11	98.98	295	2	1	51211	51504	84746509	84746803	2e-145	527
20	Chr11_20_NAU3115_00001	gnl|AD2_NBI|At11	99.41	10112	43	16	41040	51140	84736368	84746473	0	18325
20	Chr11_20_NAU3115_00001	gnl|AD2_NBI|At11	99.89	2808	3	0	38819	41626	84733562	84736369	0	5169
20	Chr11_20_NAU3115_00001	gnl|AD2_NBI|At11	97.71	175	1	2	38653	38825	84733244	84733417	2e-76	298
20	Chr11_20_NAU3115_00001	gnl|AD2_NBI|At11	99.48	5416	21	5	33417	38825	84726173	84731588	0	9840
20	Chr11_20_NAU3115_00001	gnl|AD2_NBI|At11	99.44	3578	18	1	30663	34238	84722595	84726172	0	6495
20	Chr11_20_NAU3115_00001	gnl|AD2_NBI|At11	98.45	6243	50	15	26386	32618	84711254	84717459	0	10948
20	Chr11_20_NAU3115_00001	gnl|AD2_NBI|At11	99.42	1885	10	1	21522	23406	84709377	84711260	0	3419
20	Chr11_20_NAU3115_00001	gnl|AD2_NBI|At11	98.36	6480	37	21	15042	21511	84703007	84709427	0	11315
20	Chr11_20_NAU3115_00001	gnl|AD2_NBI|At11	98.8	13748	64	24	2152	15851	84689314	84703008	0	24380
20	Chr11_20_NAU3115_00001	gnl|AD2_NBI|At11	99.16	4179	25	4	72	4244	84674409	84678583	0	7515
13	Chr11_13_Gh288_00009	gnl|AD2_NBI|At11	98.73	393	4	1	5389	5780	71438087	71437695	0	697
13	Chr11_13_Gh288_00010	gnl|AD2_NBI|At11	98.8	83	1	0	1	83	71438003	71438085	2e-32	148
13	Chr11_13_Gh288_00020	gnl|AD2_NBI|At11	93.53	170	11	0	36	205	71436357	71436188	1e-65	254
13	Chr11_13_Gh288_00010	gnl|AD2_NBI|At11	96.39	943	34	0	4440	5382	71435415	71436357	0	1554
13	Chr11_13_Gh288_00010	gnl|AD2_NBI|At11	95.38	1169	40	3	3457	4623	71434179	71435335	0	1847
13	Chr11_13_Gh288_00010	gnl|AD2_NBI|At11	95.72	1167	47	3	1896	3060	71433010	71434175	0	1875
13	Chr11_13_Gh288_00010	gnl|AD2_NBI|At11	97.4	231	5	1	1746	1975	71432778	71433008	9e-106	392
13	Chr11_13_Gh288_00010	gnl|AD2_NBI|At11	95.16	517	24	1	1117	1632	71432248	71432764	0	815
13	Chr11_13_Gh288_00009	gnl|AD2_NBI|At11	94.51	237	9	3	5391	5625	71428262	71428028	6e-97	363
13	Chr11_13_Gh288_00010	gnl|AD2_NBI|At11	97.15	771	22	0	1	771	71428180	71428950	0	1303
13	Chr11_13_Gh288_00019	gnl|AD2_NBI|At11	96.47	85	3	0	1	85	71426994	71426910	6e-32	141
13	Chr11_13_Gh288_00010	gnl|AD2_NBI|At11	98.75	160	2	0	5802	5961	71426910	71427069	1e-73	285
13	Chr11_13_Gh288_00020	gnl|AD2_NBI|At11	92.68	205	14	1	1	205	71426556	71426353	7e-78	294
13	Chr11_13_Gh288_00013	gnl|AD2_NBI|At11	97.1	69	2	0	1	69	71426074	71426006	4e-23	117
13	Chr11_13_Gh288_00010	gnl|AD2_NBI|At11	96.13	826	31	1	4866	5691	71426006	71426830	0	1347
8	Chr11_8_CIR316_00003	gnl|AD2_NBI|At11	95.64	482	9	5	6998	7475	10801200	10800727	0	763
8	Chr11_8_CIR316_00003	gnl|AD2_NBI|At11	97.33	375	6	3	21499	21873	10801200	10800830	4e-178	634
8	Chr11_8_CIR316_00003	gnl|AD2_NBI|At11	96.56	3375	107	6	9199	12564	10799187	10795813	0	5581
8	Chr11_8_CIR316_00003	gnl|AD2_NBI|At11	91.18	170	13	2	9130	9298	10795811	10795643	2e-56	230
8	Chr11_8_CIR316_00003	gnl|AD2_NBI|At11	96.78	8318	244	10	9199	17500	10794971	10786662	0	13854
14	Chr11_14_BNL3279_00004	gnl|AD2_NBI|At11	96.65	10239	302	23	90	10306	10794967	10784748	0	16969
8	Chr11_8_CIR316_00003	gnl|AD2_NBI|At11	96.82	1699	33	6	17484	19165	10786596	10784902	0	2819
8	Chr11_8_CIR316_00003	gnl|AD2_NBI|At11	95.32	171	6	2	19193	19362	10784917	10784748	1e-68	270
5	Chr11_5_UCR91_00005	gnl|AD2_NBI|At11	94.91	393	12	2	4364	4748	1077247	1076855	6e-171	608
5	Chr11_5_UCR91_00005	gnl|AD2_NBI|At11	98.13	4270	69	7	1	4261	1076911	1072644	0	7432
			97.3207	537583	5694	1001
